1 **HT-SIP: A semi-automated Stable Isotope Probing pipeline identifies interactions in the**  
2 **hyphosphere of arbuscular mycorrhizal fungi**

3  
4 Erin E. Nuccio<sup>1\*</sup> ([nuccio1@llnl.gov](mailto:nuccio1@llnl.gov)), Steven J. Blazewicz<sup>1</sup> ([blazewicz1@llnl.gov](mailto:blazewicz1@llnl.gov)), Marissa Lafler<sup>1</sup>  
5 ([mlafler@gmail.com](mailto:mlafler@gmail.com)), Ashley N. Campbell<sup>1</sup> ([a.campbell910@gmail.com](mailto:a.campbell910@gmail.com)), Anne Kakouridis<sup>2,3</sup>  
6 ([annekakouridis@lbl.gov](mailto:annekakouridis@lbl.gov)), Jeffrey A. Kimbrel<sup>1</sup> ([kimbrel1@llnl.gov](mailto:kimbrel1@llnl.gov)), Jessica Wollard<sup>1</sup>  
7 ([wollard1@llnl.gov](mailto:wollard1@llnl.gov)), Daria Vyshenska<sup>4</sup> ([dariavyshenska@lbl.gov](mailto:dariavyshenska@lbl.gov)), Robert Riley<sup>4</sup> ([rwiley@lbl.gov](mailto:rwiley@lbl.gov)),  
8 Andy Tomatsu<sup>4</sup> ([atomatsu@lbl.gov](mailto:atomatsu@lbl.gov)), Rachel Hestrin<sup>1,5</sup> ([rhestrin@umass.edu](mailto:rhestrin@umass.edu)), Rex R. Malmstrom<sup>4</sup>  
9 ([rrmalmstrom@lbl.gov](mailto:rrmalmstrom@lbl.gov)), Mary Firestone<sup>3</sup> ([mkfstone@berkeley.edu](mailto:mkfstone@berkeley.edu)), Jennifer Pett-Ridge<sup>1,6\*</sup>  
10 ([pettridge2@llnl.gov](mailto:pettridge2@llnl.gov))

11  
12 <sup>1</sup> Lawrence Livermore National Laboratory, Physical and Life Science Directorate, Livermore, CA, USA

13 <sup>2</sup> Lawrence Berkeley National Laboratory, Biosciences Division, Berkeley, CA, USA

14 <sup>3</sup> University of California, Berkeley, Department of Environmental Science Policy and Management,  
15 Berkeley, CA USA

16 <sup>4</sup> DOE Joint Genome Institute, Berkeley, CA, USA

17 <sup>5</sup> University of Massachusetts, Stockbridge School of Agriculture, Amherst, MA, USA

18 <sup>6</sup> University of California Merced, Life & Environmental Sciences Department, Merced, CA 95343 USA

19

20 \*Co-Corresponding authors

21

22

23 **ABSTRACT**

24 **Background:** Linking the identity of wild microbes with their ecophysiological traits and environmental  
25 functions is a key ambition for microbial ecologists. Of many techniques that strive to meet this goal,  
26 Stable Isotope Probing—SIP—remains the most comprehensive for studying whole microbial  
27 communities *in situ*. In DNA-SIP, active microorganisms that take up an isotopically heavy substrate  
28 build heavier DNA, which can be partitioned by density into multiple fractions and sequenced. However,  
29 SIP is relatively low throughput and requires significant hands-on labor. We designed and tested a semi-  
30 automated DNA-SIP pipeline to support well-replicated, temporally-resolved amplicon or metagenomics  
31 experiments that enable studies of dynamic microbial communities over space and time. To test this  
32 pipeline, we assembled SIP-metagenome assembled genomes (MAGs) from the hyphosphere zone  
33 surrounding arbuscular mycorrhizal fungi (AMF), in combination with a  $^{13}\text{CO}_2$  plant labelling study.

34 **Results:** Our semi-automated pipeline for DNA fractionation, cleanup, and nucleic acid quantification of  
35 SIP density gradients requires six times less hands-on labor compared to manual SIP and allows 16  
36 samples to be processed simultaneously. Automated density fractionation increased the reproducibility of  
37 SIP gradients and reduced variation compared to manual fractionation, and we show adding a non-ionic  
38 detergent to the gradient buffer improved SIP DNA recovery. We then tested this pipeline on samples  
39 from a highly-constrained soil microhabitat with significant ecological importance, the AMF fungal  
40 hyphosphere. Processing via our quantitative SIP pipeline confirmed the AMF *Rhizophagus intraradices*  
41 and its associated microbiome were highly  $^{13}\text{C}$  enriched, even though the soils' overall enrichment was  
42 only 1.8 atom%  $^{13}\text{C}$ . We assembled 212  $^{13}\text{C}$ -enriched hyphosphere MAGs, and the hyphosphere taxa that  
43 assimilated the most AMF-derived  $^{13}\text{C}$  (range 10-33 atom%) were from the phyla Myxococcota,  
44 Fibrobacterota, Verrucomicrobiota, and the ammonia oxidizing archaeon genus *Nitrososphaeara*.

45

46 **Conclusions:** Our semi-automated SIP approach decreases operator time and errors and improves  
47 reproducibility by targeting the most labor-intensive steps of SIP—fraction collection and cleanup. Here,  
48 we illustrate this approach in a unique and understudied soil microhabitat—generating MAGs of active  
49 microbes living in the AMF hyphosphere (without plant roots). Their phylogenetic composition and gene  
50 content suggest predation, decomposition, and ammonia oxidation may be key processes in hyphosphere  
51 nutrient cycling.

52

53 **KEYWORDS**

54 Stable Isotope Probing, metagenomics, microbial community, Arbuscular Mycorrhizal Fungi, SIP, AMF,  
55 soil, bacteria, archaea, ammonia oxidation

56

57

58

## 59 BACKGROUND

60 Stable isotope probing ‘SIP’ approaches, where active microbes are identified via incorporation of stable  
61 isotopes ( $^{13}\text{C}$ ,  $^{15}\text{N}$ ,  $^{18}\text{O}$ ) into their biomarkers, cells, DNA or RNA, are among the most powerful methods  
62 in microbial ecology since they can identify the most relevant active microbes and their specific  
63 ecophysiology traits in natural, ‘wild’ settings [1-7]. Broadly speaking, SIP refers to any technique where  
64 microorganisms that have consumed substrates enriched in rare stable isotopes (e.g.  $^{13}\text{C}$ ,  $^{15}\text{N}$ ,  $^{18}\text{O}$ ) are  
65 identified based on the resulting isotopic enrichment of their nucleic acids, proteins, and metabolites  
66 (reviewed in [5, 8]). However, DNA-SIP—where isotopically enriched DNA is separated from  
67 unenriched nucleic acids via isopycnic separation in cesium chloride—is the most commonly used SIP  
68 approach, typically in conjunction with 16S rRNA gene or shotgun metagenome analysis. A cornerstone  
69 of many seminal studies of microbial biogeochemical cycling, DNA-SIP has been used to identify  
70 populations involved in decomposer food webs [9], consume plant root exudates [10, 11], degrade  
71 pollutants [12] and  $\text{C}_1$  compounds [13], oxidize ammonia [14], fix  $\text{N}_2$  [15, 16], or to characterize  
72 population growth, survival and mortality in mixed communities [17, 18].

73 Quantitative stable isotope probing (qSIP) and techniques such as ‘high resolution’ SIP (HR-SIP)  
74 [19] are expansions of the original SIP concept that combine density gradient ultracentrifugation with  
75 mathematical models designed to improve the quantification (sensitivity and specificity) of isotope  
76 enrichment [6, 20]. When used with a  $^{18}\text{O}$ -enriched ‘heavy water’ addition, qSIP enables calculation of  
77 growth and mortality rates of individual taxa, since cells and viruses incorporate oxygen from water  
78 during nucleic acid synthesis, quantitatively reflecting cell division (DNA synthesis) and metabolism  
79 (RNA synthesis) [21-23]. Recent qSIP studies have used the method to illustrate how wild microbial  
80 communities are shaped by evolutionary history [24, 25], soil temperature and warming [26, 27],  
81 amendments of water and nutrients [18, 28] and trophic relationships amongst bacterial predators and  
82 their prey [29].

83           While the majority of SIP and qSIP studies have focused on 16S rRNA gene profiles, targeting  
84 active populations with shotgun sequencing (metagenomes and metatranscriptomes) provides greater  
85 opportunity for inference of genomic potential and whole genome-scale data analysis [30-32], define  
86 microbial guilds [33], and provide insights into cross-kingdom interactions (including virus-host  
87 matching) [23, 34]. But SIP-metagenomics is a daunting prospect for many research groups, as multiple  
88 metagenome datasets are generated from each initial microbiome DNA sample, creating financial and  
89 computational limitations that constrain experimental scope. Sieradzki et al. (2020) [35] explain the  
90 relationships between sample replication, enrichment and the precision achievable with a given number of  
91 SIP density fractions (and suggest 9 fractions is typically ideal). Additionally, processing SIP density  
92 gradients is a relatively low throughput process and requires significant hands-on labor, making it onerous  
93 to conduct the well-replicated, temporally resolved experiments needed to study dynamic microbial  
94 community activities over space and time. Historically, SIP studies have used few replicates due to the  
95 laborious nature of the technique. To address this short-coming, we have designed a high-throughput SIP  
96 (HT-SIP) pipeline for processing SIP density gradients, which automates fractionation, partially  
97 automates fraction cleanup, and automates the preparation of samples for nucleic acid quantification. We  
98 have now tested replicates of this pipeline at both LLNL and the JGI for over two years, running 1000s of  
99 samples.

100           To validate and demonstrate the utility of our HT-SIP pipeline on an important yet challenging  
101 sample set, we targeted the ‘hyphosphere’ soil microhabitat using <sup>13</sup>C labeling—the area under direct  
102 influence of arbuscular mycorrhizal fungal (AMF) hyphae. Arbuscular mycorrhizal fungi (members of the  
103 Glomeromycota) form obligate symbiotic associations with 80% of all land plants [36], and in exchange  
104 for plant carbon (C), supply their host with essential nutrients such as N and P [37, 38] and water [39].  
105 Intriguingly, AMF are capable of stimulating decomposition of soil organic matter (SOM) and dead plant  
106 material [40-42], but do not have the enzymatic repertoire to decompose SOM themselves. As such, the  
107 importance of interactions with the soil microbiome is potentially critical [43], and previous research

108 suggests that AMF modify their surrounding soil litter-decomposing microbial community in order to  
109 acquire nitrogen derived from SOM, and transport it to the host plant [38, 44]. However, these  
110 interactions occur at such a small spatial scale (hyphae are ca. 1.5 – 18  $\mu\text{m}$  in diameter [45]) that they are  
111 extremely difficult to measure and monitor. Using SIP, in conjunction with  $^{13}\text{CO}_2$  labeling of a plant host  
112 inoculated with AMF, we tracked plant-fixed carbon through AMF hyphae and into the surrounding  
113 hyphosphere microbiome.

114 To generate SIP-metagenomes from the AMF-hyphosphere, we  $^{13}\text{CO}_2$  labeled the wild annual  
115 grass, *Avena barbata*, inoculated with the AMF *Rhizophagus intraradices* in sterile sand. The  
116 microcosms contained a separate hyphal chamber with live soil that only AMF hyphae could access, from  
117 which hyphal aggregates were collected and extracted for  $^{13}\text{C}$ -hyphosphere SIP processing. We used our  
118 semi-automated pipeline to process samples from this microhabitat, and produced high quality libraries  
119 and MAGs even while using an unusually low starting DNA input for SIP separations (350 ng DNA). Our  
120 work demonstrates that automation not only saves operator time and improves reproducibility of SIP  
121 processing, but is also suitable for analysis of low DNA quantities and downstream amplicon and  
122 metagenomics analysis. The  $^{13}\text{C}$ -hyphosphere MAGs assembled in this study are a key advance for  
123 dissecting trophic interactions in the AMF hyphosphere.

124

## 125 **METHODS**

### 126 ***Density Gradient Separations***

127 HT-SIP validation experiments were conducted using 1-5  $\mu\text{g}$  DNA for SIP density gradient separations  
128 (below, amounts and DNA sources are specified per experiment). To separate DNA based on isotopic  
129 enrichment, DNA was added to 150  $\mu\text{L}$  1xTE buffer mixed with 1.00 mL gradient buffer, and 4.60 mL  
130 CsCl stock ( $1.885 \text{ g mL}^{-1}$ ) with a final density of  $1.725\text{-}1.730 \text{ g mL}^{-1}$ . Samples were loaded into  
131 ultracentrifuge tubes (5.1 mL, Quick-Seal Round-Top Polypropylene Tube, Beckman Coulter) and spun  
132 at  $20^\circ\text{C}$  for 108 hours at  $176,284 \text{ RCF}_{\text{avg}}$  (equivalent to  $176,284 \times g$ ) in a Beckman Coulter Optima XE-90  
133 ultracentrifuge using a VTi65.2 rotor, following a previously described protocol [17, 35] to create density  
134 gradients.

135

### 136 ***High-Throughput SIP (HT-SIP) Pipeline***

137 To automate the labor-intensive steps of SIP—density gradient fractionation, cleanup, and  
138 quantification—we combined a series of robotic instruments. Following cesium chloride (CsCl) density  
139 gradient separation in an ultracentrifuge, we automated fractionation by connecting an Agilent  
140 Technologies 1260 Isocratic Pump and 1260 Fraction Collector to a Beckman Coulter Fraction Recovery  
141 System (see Supplemental Figure S1 for schematic and parts list). In this system, each sample is separated  
142 into 22 fractions ( $\sim 236 \mu\text{L}$  each). CsCl is displaced in the ultracentrifuge tube by pumping sterile water at  
143  $0.25 \text{ mL min}^{-1}$  through a 25G needle inserted into the top of the ultracentrifuge tube, and the sample  
144 fraction exits via a side port needle inserted into the bottom of the tube. We maintain pressure between 1-  
145 1.8 bar; pressures above this indicate the system is clogged. The gradient medium fractions are dispensed  
146 into 96-well deep well plates (2 ml square well plates with v-bottoms, Stellar Scientific) by the Agilent  
147 Fraction Collector. Four SIP tubes are fractionated into a single deep-well plate (88 wells) and the final  
148 row is left empty for PicoGreen quantification standards. At the beginning of the day and after every four  
149 gradients, we clean the fractionation tubing with water using a “wash spacer” to bypass the fraction  
150 recovery system (see Supplemental Figure S1). The density of each fraction is measured manually using a

151 Reichart AR200 digital refractometer fitted with a prism covering to facilitate measurement from 5  $\mu$ L, as  
152 previously described [46].

153 DNA in each density fraction is then purified (desalted) and concentrated using a Hamilton  
154 Microlab STAR liquid handling robot, which we have programmed to automate PEG precipitations using  
155 a previously published protocol [47], with modifications for 96-well plates. We configured our robot deck  
156 to process four plates; this allows a maximum of 16 SIP samples to be processed simultaneously (4  
157 samples per plate). Following fractionation, the robot adds 2 volumes of 30% PEG 6000 (in 1.6 M NaCl)  
158 and 35ul of 1:5 diluted Glycoblu (Invitrogen, Thermo Fisher) to each well. Plates are then manually  
159 sealed and mixed thoroughly by vortexing and manual shaking, pulsed down briefly, and incubated at  
160 room temperature in the dark overnight. To precipitate the DNA, we spin the four plates at 4198 RCF for  
161 5 hours at 20°C in an Eppendorf 5920R centrifuge using a S-4xUniversal-Large rotor. The plates are then  
162 placed back in the Hamilton robot, which removes the PEG by pipetting and rinses the pellets using 950ul  
163 70% ethanol. Plates are manually sealed, gently mixed by vortexing, and centrifuged at 4198 RCF for 1.5  
164 hours at 20°C to stabilize the DNA pellets. We aspirate the ethanol with the robot, and then manually  
165 place the plates upside down on a paper towel to drain remaining ethanol. The plates are then returned to  
166 the robot to dry for 15 minutes, whereafter the robot automatically resuspends the DNA pellets in 40  $\mu$ L  
167 of 1x Tris-EDTA (pH 7.5); 10 mM Tris-HCl may be used for applications sensitive to EDTA. Finally,  
168 plates are manually sealed and stored at -20°C.

169 Finally, DNA concentration of each fraction is quantified with a PicoGreen fluorescence assay  
170 (Invitrogen, Thermo Fisher). Picogreen quantification plates are prepared in triplicate on a Hamilton  
171 Microlab STAR robot, where each plate contains a row for the standard curve. Samples are mixed with  
172 the PicoGreen reagent in a 96-well intermediate mixing plate, and then distributed into three 96-well PCR  
173 plates for fluorescence analysis. Plate fluorescence is measured in a CFX Connect Real-Time PCR  
174 Detection System (Bio-Rad), and the fluorescence values for the three technical replicate plates are  
175 averaged to determine DNA concentration.

176



177 ***Validation of HT-SIP using Manual SIP***

178 To validate the automated steps of our HT-SIP pipeline, we compared fractionation and PEG  
179 precipitations using both manual and automated methods. Automated fractionation was performed as  
180 described above, and manual fractionation was conducted with a Beckman Coulter fraction recovery  
181 system as previously described [17]. Samples were fractionated into approximately 22 fractions, although  
182 the number of fractions recovered by manual SIP typically varies despite identical run conditions.

183 To compare automated versus manual PEG precipitations, 4 ug soil DNA (extracted from a  
184 sample collected at the Hopland Research and Extension Center in Hopland, CA 38°59'35"N, 123°4'3"W)  
185 was added per density gradient. For manual samples, following manual fractionation, PEG precipitations  
186 were conducted in microcentrifuge tubes as previously described [47] using published centrifuge speeds  
187 and times, which we note are faster than those used for our HT-SIP plate-based method.

188

189 ***Increasing DNA-SIP recovery using non-ionic detergents***

190 Absorption of DNA to polypropylene tubes can lead to substantial sample loss, especially for DNA in  
191 high ionic strength solutions [48], but this concern can be mitigated by adding non-ionic detergents [48].  
192 Since the ultracentrifuge tubes used in DNA-SIP protocols are made of polypropylene and CsCl is a high  
193 ionic strength solution, we tested whether adding the non-ionic detergents Tween-20 and Triton-X to  
194 density gradient buffer improved DNA recovery. To identify the optimal concentration of detergent for  
195 DNA-SIP recovery, we tested additions in the range of 0.0001 – 1% for Tween-20 and 0.0001 – 0.1% for  
196 Triton-X and compared DNA recovery versus the standard density gradient formulation. 1 ug of *E. coli*  
197 genomic DNA (Thermo Scientific) was added to density gradients and processed using the HT-SIP  
198 pipeline (n=3 gradients per condition). After identifying that adding 0.0001% Tween-20 had the highest  
199 percent DNA recovery, we assessed 0.0001% Tween-20 additions to a larger set of soil DNA samples  
200 (101 SIP tubes total) using our HT-SIP pipeline. We added 4 µg of soil DNA (from Hopland, CA soil) to  
201 these gradients.

202

### 203 ***Validation of HT-SIP Pipeline: Hyphosphere <sup>13</sup>C<sub>2</sub> Labeling and Harvest***

204 AMF hyphosphere soil was <sup>13</sup>C-labeled in <sup>13</sup>CO<sub>2</sub> plant growth chambers; details on the microcosm design  
205 and growth conditions are documented in [39]. Briefly, *Avena barbata* seedlings were planted in the  
206 ‘plant compartment’ of two-compartment microcosms and grown for 10 weeks. The plant compartment  
207 was separated from the ‘no-plant compartment’ by a 3.2 mm air gap to prevent root exudates or dissolved  
208 organic C from travelling via mass flow between compartments. Both sides of the air gap had nylon mesh  
209 that either allowed hyphae but excluded roots (18 μm mesh), or that excluded both hyphae and roots (0.45  
210 μm mesh).

211 In the plant compartment, a sterile sand mix (1:1 volumes of sand and clay, plus 78 mg of  
212 autoclaved bonemeal) was inoculated with 26 g of whole inoculum of *Rhizophagus intraradices*  
213 (accession number AZ243, International Culture Collection of (Vesicular) Arbuscular Mycorrhizal Fungi  
214 (INVAM), West Virginia University, Morgantown, WV). The no-plant compartment contained a mixture  
215 of 1:1 volumes of live soil (from Hopland CA) and sand plus 78 mg of autoclaved bone meal.

216 The microcosms were incubated in growth chambers in the Environmental Plant Isotope Chamber  
217 (EPIC) facility, located in the Oxford Tract Greenhouse at UC Berkeley, in temperature-controlled  
218 growth chambers with a multiplexed <sup>13</sup>CO<sub>2</sub> delivery system monitored by IRGA and Picarro CO<sub>2</sub>  
219 analyzers. For this study, three microcosms with 18 μm mesh (<sup>13</sup>C AMF permitted in the no-plant  
220 compartment, termed ‘<sup>13</sup>C-hyphosphere’) and three microcosms with 0.45 μm mesh (<sup>13</sup>C AMF excluded  
221 from the no-plant compartment, termed ‘<sup>13</sup>C no-AMF control’, for IRMS analysis only) were  
222 continuously <sup>13</sup>CO<sub>2</sub>-labeled for 6 weeks during weeks 5-10. Six additional microcosms remained in a  
223 natural abundance CO<sub>2</sub> atmosphere for the full ten weeks; of these, the three <sup>12</sup>C microcosms with 18 μm  
224 mesh (<sup>12</sup>C AMF permitted in the no-plant compartment, termed ‘<sup>12</sup>C-hyphosphere’) served as the <sup>12</sup>C-  
225 hyphosphere SIP controls, and three <sup>12</sup>C microcosms with 0.45 μm mesh (<sup>12</sup>C AMF excluded from the no-  
226 plant compartment) were for IRMS analysis only. AMF-specific Sanger sequencing of the plant  
227 compartment (roots, sand) as well as the air-gap indicated the planted compartment only contained the  
228 initial mycorrhizal inoculum [39].

229           At the beginning of week 11, all microcosms were destructively sampled. Soil was placed in  
230 Whirl-Pak bags, flash frozen in liquid nitrogen, and stored at -80°C. To collect hyphosphere microbial  
231 communities, visible hyphal aggregates with hyphosphere soil attached were collected from the no-plant  
232 compartments using tweezers under a dissecting microscope for +AMF microcosms. For no-AMF  
233 controls, the soil mix was sampled the same way, except no hyphae were visible. During the microcosm  
234 harvest, plant shoots, roots, and soil from the planted and unplanted chambers were placed in paper  
235 envelopes and then dried 60°C for 72 hours for <sup>13</sup>C IRMS analysis. These samples were finely ground,  
236 weighed, and analyzed for total C and <sup>13</sup>C abundance by dry combustion on a PDZ Europa ANCA-GSL  
237 elemental analyzer interfaced to a PDZ Europa 20-20 isotope ratio mass spectrometer (Sercon Ltd.,  
238 Cheshire, UK). Stated precision by the manufacturer for <sup>13</sup>C is 0.1 per mil.

239

#### 240 ***Hyphosphere HT-SIP Density Gradient Separations***

241 DNA was extracted from 250 mg of hyphal aggregates using the DNeasy PowerSoil kit (Qiagen). We  
242 added 350 ng of <sup>13</sup>C- and <sup>12</sup>C-hyphosphere hyphosphere DNA (n = 3 each) to density gradients and  
243 ultracentrifuged as described above, and then fractionated, precipitated, and quantified using the HT-SIP  
244 pipeline. DNA pellets were resuspended in 10mM Tris-HCl (pH 7.5) because the low DNA mass in each  
245 fraction required us to use a large fraction volume during sequence library creation and would have  
246 resulted in higher than recommended EDTA concentrations (< 0.1 mM EDTA final concentration).

247

#### 248 ***Metagenomic Sequencing Library Preparation and Sequencing***

249 Since the overall soil <sup>13</sup>C-enrichment was relatively low in these samples, we sequenced metagenomes  
250 from 14 fractions per sample to increase the chance of detecting taxa with significant <sup>13</sup>C-enrichment;  
251 Sieradzki et al. [35] have shown that sensitivity is correlated with isotopic enrichment. Fractions with low  
252 concentrations of DNA at the beginning (fractions 3-6) and end of the gradient (fractions 19-21) were  
253 combined and concentrated prior to sequencing using an Amicon Ultra-0.5 30KDa filter (Millipore  
254 Sigma) [49]; fractions 7-18 were sequenced without concentration. Whole genome metagenomic libraries

255 were prepared at LLNL using the Illumina DNA Flex library kit (now called Illumina DNA Prep,  
256 Illumina Inc., Santa Clara, CA) using 1 ng of sample DNA and 12 cycles of amplification. The libraries  
257 were dual indexed with Illumina Nextera DNA CD indexes following the manufacturer's recommended  
258 protocol and quantified using a Qubit broad range dsDNA assay (Thermo Fisher Scientific, Waltham,  
259 MA). Library insert sizes were determined via Agilent TapeStation with the D5000 High Sensitivity assay  
260 (Agilent Technologies, Santa Clara, CA). Equimolar amounts of each library were pooled together. The  
261 pooled libraries' sizes and concentrations were verified using the D5000 High Sensitivity assay (Agilent  
262 Technologies, Santa Clara, CA).

263 The library was diluted and denatured as described [50] to a final concentration of 375 pM (2%  
264 phiX and 98% library). The library pools were sequenced with NextSeq 1000/2000 P2 or P3 reagents  
265 (Illumina Inc., Santa Clara, CA) as paired end 2 X 150 cycles on an Illumina NextSeq2000 Sequencer at  
266 Lawrence Livermore National Laboratory. In total,  $2.6 \times 10^9$  read pairs passed quality filtering, with a  
267 mean of  $3.1 \times 10^7$  read pairs per sample/fraction and a range of  $3.0 \times 10^6$  to  $1.1 \times 10^8$  read pairs.

268

### 269 ***Metagenome Assembly***

270 Our prior research indicates that coassemblies of all SIP gradient fractions from biological replicates yield  
271 the best metagenome-assembled genomes (MAGs) [31, 51]. Metagenomic sequences were loaded into  
272 IMG v5.1.1. We created individual assemblies using metaspades [52] and a single co-assembly including  
273 all fractions using MetaHipMer v2 [51]. MetaHipMer produced more contigs (Supplemental Table S2),  
274 so we proceeded with this assembly. Sequences were mapped to the assembly using bbmap [53], binned  
275 with Metabat v2.12.1, and then bins were refined with metaWRAP v1.2.1 [54]. MAG quality was  
276 determined by CheckM v1.1.3 [55], taxonomy determined by GTDB-tk v1.50 with version r202 of the  
277 GTDB taxonomy database [56] and final metrics are reported using Minimum Information about a  
278 Metagenome Amplified Genome (MIMAG) standards [57]. MAG abundances were determined using  
279 bbsplit [53]. The sequenced genome of *Rhizophagus irregularis* DAOM 197198 was included in the  
280 bbsplit reference library to map AMF sequences (RefSeq assembly accession: GCF\_000439145.1) [58].

281           The genomic capacities of high- and medium-quality MAGs of highly  $^{13}\text{C}$  enriched hyphosphere  
282 taxa were determined by annotating into functional categories with Patric subsystems [59] and KEGG  
283 orthologs from KofamKOALA [60]. Carbohydrate active enzyme (CAZyme) gene homologs were  
284 determined using dbCAN HMM analysis [61]. Protease homologs were determined using blastp against  
285 the MEROPS v.12.1 database [62]; an initial screen was performed using the “merops\_scan.lib” database,  
286 and positive hits were then compared to the larger “pepunit.lib” database, which is a non-redundant  
287 library of all peptidase units and inhibitor units in MEROPS.

288

### 289 ***Quantitative SIP Analysis***

290 We applied quantitative SIP (qSIP) calculations to estimate the atom percent excess (APE)  $^{13}\text{C}$   
291 enrichment for each taxon following procedures detailed in Hungate et al. [20] with adjustments for  
292 metagenome-assembled genomes instead of 16S rRNA genes [31, 34]. qSIP uses the number of reads per  
293 fraction across the SIP gradient to estimate the APE of each taxon within the enriched sample compared  
294 to the natural abundance control. To estimate the amount of taxon-specific DNA per fraction, we  
295 calculated the proportion of the library attributable to the MAG and multiplied by the DNA content per  
296 fraction ( $[\text{MAG\_counts} / \text{total\_library\_counts}] * \text{ng\_fraction\_DNA}$ ). Since our reference database of  
297 MAGs is incomplete, and does not include genomes for eukaryotes and fungi other than the AMF *R.*  
298 *intraradices*, we normalized MAG counts to total sequencing library counts because this includes the  
299 portion of the library with no sequenced representatives. After the MAG sequence counts were converted  
300 into estimates of DNA mass (ng), weighted average densities (WAD) for each MAG were calculated for  
301 each gradient. The differences in WAD between the  $^{13}\text{C}$  and  $^{12}\text{C}$  gradients were used to estimate the atom  
302 percent excess for each MAG [20]. All MAGs were present in all three replicates. To be considered  $^{13}\text{C}$ -  
303 enriched, the 90% lower confidence interval of a MAG’s median APE- $^{13}\text{C}$  needed to be  $>0\%$  APE- $^{13}\text{C}$ .

## 304 RESULTS

### 305 *Reproducibility of automated fractionation*

306 Automated fractionation increased the reproducibility of fractionation; the buoyant densities of automated  
307 samples had a more consistent linear fit across gradients ( $r^2 = 0.984$ ,  $n = 24$  gradients) compared to  
308 manually fractionated gradients ( $r^2 = 0.908$ ,  $n = 22$  gradients) (**Figure 1**). With manual fractionation, the  
309 sample to sample variability of fraction density increased in fractions collected later in the process (less  
310 dense) and resulted in a more variable number of fractions even though identical fractionation conditions  
311 were used (range = 15 – 27 fractions); in contrast, automated fractionation consistently resulted in 22  
312 fractions.

313

### 314 *Effect of non-ionic detergents on automated DNA recovery*

315 Post-fractionation DNA recovery is a key concern for DNA-SIP studies, especially for samples where  
316 total DNA volume is limited. In our initial testing of >1000 environmental DNA samples (at LLNL and  
317 JGI), we noticed DNA percent recovery tended to improve when larger masses of DNA were added to the  
318 density gradient (3-5  $\mu\text{g}$ ) and hypothesized that DNA was being lost by an adsorption mechanism. We  
319 therefore tested how adding the non-ionic detergents Tween-20 and Triton-X affected DNA recovery in  
320 density gradients, which can mitigate potential DNA loss by adsorption to polypropylene tube walls [48].  
321 Adding Tween-20 at final concentrations  $\leq 0.01\%$  reliably increased the recovery of 1  $\mu\text{g}$  pure culture *E.*  
322 *coli* DNA, and Tween-20 at 0.0001% yielded the highest overall DNA recovery ( $84 \pm 5\%$ ) compared to a  
323 no-detergent control ( $64 \pm 5\%$  recovery) (Supplemental Table S1). Triton-X only improved DNA  
324 recovery at a final concentration of 0.0001% ( $74 \pm 3\%$ ).

325         Using soil DNA in the absence of Tween-20, we had higher DNA recovery with manual  
326 processing (measured after the precipitation step) relative to the automated protocol (**Figure 2a**). When  
327 0.0001% Tween-20 was included in the density gradient buffer, soil DNA recovery with the automated  
328 protocol was comparable to the manual approach (**Figure 2**). For the automated protocol, adding Tween-

329 20 significantly increased soil DNA yields by a factor of 1.8 from  $35 \pm 4\%$  to  $64 \pm 3\%$  (mean  $\pm$  95% CI;  $p$   
330  $< 0.01$  for one-tailed t-test) (**Figure 2b**).

331

### 332 *SIP automation time savings*

333 In HT-SIP, automating multiple steps in sample SIP processing substantially increased the overall speed  
334 of the procedure and decreased the amount of manual or “hands-on” labor required. Using automation  
335 during fraction collection, sample cleanup, and DNA quantification, it is manageable to process 16  
336 samples in parallel (this batch number is constrained by the typical number of spaces available in an  
337 ultracentrifuge rotor). Overall, HT-SIP requires half as much technician time to fully process 16 samples  
338 (42 h versus 20 h for 16 samples), and 6.25 times fewer hands-on hours compared to serially processing  
339 single samples manually (**Table 1**); within a work week, this represents 3.2 days of hands-on labor  
340 saved. Manual estimates assume no parallelization and are based on the minimum amount of time  
341 required to process a single SIP gradient under ideal conditions in our laboratory.

342

### 343 *HT-SIP validation: Hyphosphere soil*

344 To demonstrate the HT-SIP pipeline on an important yet challenging sample set (low DNA, low overall  
345 enrichment), we targeted hyphosphere soil (the area under direct influence of arbuscular mycorrhizal  
346 fungal (AMF) hyphae) using  $^{13}\text{C}$  labeling of the annual grass *Avena barbata* in a two-compartment  
347 microcosm. After six weeks of labeling, roots in the planted compartment of  $^{13}\text{C}$ -AMF microcosms were  
348 highly enriched ( $41.3 \pm 1.9$  atom%  $^{13}\text{C}$ ). Root biomass in the  $^{12}\text{C}$  microcosms was unenriched ( $1.1 \pm$   
349  $0.001$  atom%  $^{13}\text{C}$ ). In the no-plant compartment of  $^{13}\text{C}$ -AMF microcosms, bulk analysis of the soil  
350 showed it was slightly enriched ( $1.8 \pm 0.1\%$  atom%  $^{13}\text{C}$ ), whereas in the no-AMF control microcosms  
351 (where AMF were excluded from the no-plant compartment), the soil  $^{13}\text{C}$  content was not statistically  
352 different from the  $^{12}\text{C}$  control soil ( $1.1 \pm 0.001\%$  versus  $1.1 \pm 0.0003\%$ , respectively,  $p < 0.001$ ). This  
353 indicates that  $^{13}\text{CO}_2$  diffusion into the soil from the labeling chamber headspace was minimal, there was

354 no significant autotrophic  $^{13}\text{C}$ -fixation in the no-plant compartment, and that enriched  $^{13}\text{C}$  detected in the  
355 hyphosphere was transferred primarily by the AMF hyphae.

356 To identify  $^{13}\text{C}$  enriched metagenome assembled genomes (MAGs) in the hyphosphere, we used  
357 the HT-SIP pipeline on DNA extracted from soil-covered hyphal aggregates (termed, “hyphosphere”)  
358 collected from the no-plant compartment in both  $^{13}\text{C}$ - and  $^{12}\text{C}$ -AMF microcosms. SIP density separations  
359 of total DNA showed evidence of only slight  $^{13}\text{C}$ -enrichment, as seen by the small increase in weighted  
360 average density (WAD) between  $^{12}\text{C}$  and  $^{13}\text{C}$  samples (**Figure 3a**). After mapping the SIP metagenomic  
361 reads to the *R. irregularis* genome, we calculated atom percent excess (APE) using qSIP, and found the  
362 AMF DNA was significantly  $^{13}\text{C}$ -enriched (23 atom%  $^{13}\text{C}$ ) (**Figure 3b**).

363

#### 364 *Hyphosphere-qSIP metagenome assembly and binning*

365 All fractions were co-assembled using MetaHipMer2, which produced 14.4 assembled Gbp > 1 kb and  
366 1.6 assembled Gbp > 10 kb. Compared to single fraction assembly using metaspades, MetaHipMer2  
367 produced 3.3 and 3.2 times more assembled Gbp > 1 kb and Gbp > 10 kb, respectively (Supplemental  
368 Table S2). We therefore proceeded with the MetaHipMer2 assembly (which did not require bin  
369 dereplication). Overall, 71.2 % of the sequence reads mapped to the MetaHipMer2 assembly. Binning  
370 produced 299 medium- and high-quality MAGs; completeness, percent contamination, and MAG genome  
371 size are available in Supplemental Table S3. Three MAGs were 100% complete, including taxa in the  
372 orders Cytophagales (mCT1; Bacteroidota), Nitrososphaerales (mCT2; Archaea), and Pedosphaerales  
373 (mCT3; Verrucomicrobiota). The phyla with the most MAGs assembled were Bacteroidota (68),  
374 Proteobacteria (51), the candidate phylum radiation Patescibacteria superphylum (50), and Myxococcota  
375 (30). On average,  $13.3 \pm 7.6\%$  SD of the sequence reads mapped to the MAGs.

376

#### 377 *Genomic potential of $^{13}\text{C}$ -enriched MAGs in the AMF hyphosphere*

378 The soil microbial community in the  $^{13}\text{C}$  AMF hyphosphere was significantly isotopically enriched; of the  
379 299 assembled MAGs, 212 were significantly  $^{13}\text{C}$  enriched, indicating they consumed plant-fixed  $^{13}\text{C}$



380 transported by the AMF hyphae (**Figure 3e**). Of these, 43 MAGs were moderately enriched (> 5-10%  
381 APE-<sup>13</sup>C) and 12 MAGs were highly enriched (>10% APE-<sup>13</sup>C), which included 8 Myxococcota MAGs,  
382 a Fibrobacterota from the family UBA11236 (mCT95), an ammonia oxidizing archaeon (AOA) from the  
383 family *Nitrososphaera* (mCT2), and two MAGs from the Verrucomicrobiota family Opitutaceae (mCT7,  
384 mCT160) (**Figure 4**).

385 We used comparative genomics of carbohydrate degradation genes (CAZymes), as well as other  
386 genes, to assess possible roles for these MAGs in the microbial food web based on their genomic  
387 potential. Except for the AOA, highly enriched MAGs had multiple homologs of PL6 genes (alginate and  
388 non-alginate polysaccharide lyases [57]) and GH109 genes (glycoprotein  $\alpha$ -N-acetylgalactosaminidases)  
389 (Supplemental Table S4); PL6 family enzymes were disproportionately abundant in highly <sup>13</sup>C-enriched  
390 MAGs (12 of 29 MAGs).

391 Myxococcota are facultative microbial predators that can subsist by predation or saprotrophy  
392 [63]. Eight Myxococcota MAGs ranged in APE-<sup>13</sup>C from 12-32%, and seven of these were from the little-  
393 known Polyangia family Fen-1088 that is known only from metagenomic sequencing (only 31 MAGs in  
394 the Genome Taxonomy Database (GTDB)) (accessed June 2022) [64]. Similar to many Myxococcota  
395 [65], Fen-1088 have high GC contents (68-71%) and large genome sizes (3.5-7.8 Mbp) (Supplemental  
396 Table S3). Three highly-enriched Fen-1088 MAGs (mCT241, mCT215, mCT114) were ca. 10 APE-<sup>13</sup>C  
397 more enriched than the AMF and ranged from 30-32% APE-<sup>13</sup>C (**Figure 3c**, mCT241). Compared to a set  
398 of Myxococcota type species genomes [65], these three Fen-1088 MAGs contain similar amounts of  
399 genes associated with predation, such as potential cell lysis CAZyme families (7 GH13 genes, 5-7 GH23  
400 genes) and protease genes (203-225 MEROPS protease homologs) (Supplemental Table S5). Two of the  
401 MAGs contain a chitinase gene (mCT114, mCT215) (Supplemental Table S6). However, these highly  
402 enriched MAGs were enriched in glycoside hydrolases and polysaccharide lyases that are atypical for  
403 Myxococcota type species [65], such as GH29 ( $\alpha$ -fucosidases), GH109 ( $\alpha$ -N-acetylgalactosaminidases),  
404 GH8 ( $\beta$ -1,4 linkages, such as those found in plant cell walls), PL6 (alginate and non-alginate lyases [66]),  
405 and PL14 (lyases of unknown function, including poly(b-mannuronate) lyase). These genomic differences

406 are also apparent across the Myxococcota MAGs from this study, where the highly  $^{13}\text{C}$ -enriched Fen-  
407 1088 MAGs consistently contained more PL6 and GH29 homologs than less-enriched Myxococcota  
408 (**Figure 5**).

409 Fibrobacterota mCT95 had the same APE as the AMF (23% APE- $^{13}\text{C}$ ) and has chitinolytic  
410 potential (9 genes with GH18 domains and 2 genes with GH19 domains, 6 of which were annotated as  
411 chitinases (EC 3.2.1.14)). This Fibrobacterota MAG also contained GH74 genes for lysing  $\beta$ -1,4 glucan  
412 linkages in plant cell wall polysaccharides.

413 The AOA *Nitrososphaera* mCT2 (**Figure 3d**) was enriched at 12% APE- $^{13}\text{C}$  and contained genes  
414 for ammonia oxidation (amoABC) and nitrite reductase (nirK), as well as the marker gene for the 3-  
415 hydroxypropionate/4-hydroxybutyrate cycle for autotrophic C fixation (hydroxybuteryl-CoA dehydratase)  
416 [67]. The *Nitrososphaera* MAG had low glycoside hydrolase content (only 7 genes), no polysaccharide  
417 lyase genes, but many glycosyltransferase genes (24 genes).

418 Finally, two Opitutaceae MAGs were 11-12% APE- $^{13}\text{C}$  enriched. These genomes contained  
419 multiple genes with CAZy domains for processing glucose- and galactose-based uronic acids, such as  
420 genes for lysing  $\beta$ -1,4 linkages in polyglucuronic acid (PL20), hydrolizing  $\alpha$ -1,4 glycosidic linkages in  
421 polygalacturonic acid (GH28), and hydrolyzing glucuronic and galacturonic acid monomers (GH105).  
422 Polygalacturonases lyse the pectin in plant cell walls [68], while polyglucuronases target the cell walls of  
423 bacteria, fungi, and algae [69]. The Opitutaceae MAGs also contained multiple copies of GH29  $\alpha$ -  
424 fucosidases. A detailed list of taxonomy and isotopic enrichment for all MAGs is available in  
425 Supplemental Table S3, and a comparison of the CAZyme gene content for MAGs with >10% APE- $^{13}\text{C}$  is  
426 available in Supplemental Table S4.

427

428

## 429 **DISCUSSION**

430 Stable Isotope Probing is a powerful technique for resolving population demographics, functional traits,  
431 and ecological interactions of active microorganisms *in situ*, without the need for cultivation. However,  
432 SIP is not as broadly used as it could be, particularly for sequence-intensive metagenomics and  
433 transcriptomics studies, because it is relatively low throughput, time-consuming, and highly manual.  
434 Therefore, SIP has rarely been applied with well-replicated, temporally-resolved experimental designs  
435 necessary to reveal evolving microbial community activities over space and time. We have created a high  
436 throughput semi-automated SIP pipeline, ‘HT-SIP’, which enables substantially higher sample  
437 throughput, reduces labor costs, and makes it more feasible to invest effort in high-risk low-biomass  
438 samples that can be used to target the metagenomes of specific function-based subpopulations in complex  
439 microbial communities. Since establishing our pipeline (replicated at both LLNL and JGI), we have run  
440 more than 1000 samples from a diverse array of sites, including samples from boreal, temperate  
441 grassland, agricultural, and tropical forest habitats. This scalable pipeline automates density gradient  
442 fractionation, fraction cleanup, and quantification, and we show this method decreases operator time,  
443 reduces operator error, and improves reproducibility. Using HT-SIP, we were able to target an important  
444 microhabitat, the AMF hyphosphere, and examine potential trophic interactions in the fungal hyphosphere  
445 based on  $^{13}\text{C}$ -enrichment.

446

### 447 ***Hyphosphere-SIP: Processing samples with low isotopic enrichment***

448 Assessing a sample’s isotopic enrichment (e.g. via mass spectrometry), is often used as a pre-screen factor  
449 when deciding whether or not to proceed with SIP density gradient separations, and the number of  
450 replicates and SIP fractions to be sequenced. Samples with lower isotopic enrichment require more  
451 replicates and fractions to detect taxon-specific enrichment [35]. Based on our soil IRMS data and SIP  
452 data alone (**Figure 3a**), we typically would not have proceeded with the hyphosphere samples collected  
453 from our  $^{13}\text{C}$  AMF study, due to their low overall enrichment. However, since AMF are obligate  
454 biotrophs and the plant biomass was highly  $^{13}\text{C}$  enriched, we hypothesized that AMF hyphae and their

455 surrounding hyphosphere might also be enriched, and that the low bulk  $^{13}\text{C}$  hyphosphere value might have  
456 been caused by dilution from a large  $^{12}\text{C}$  soil background, along with our inability to physically sample  
457 this microhabitat precisely. We thus proceeded with a DNA-SIP strategy of sequencing all fractions (14  
458 total) to increase the chance of detecting enriched taxa. While initial IRMS data and total DNA-SIP  
459 separations suggested SIP might be impracticable on these samples due to insufficient  $^{13}\text{C}$  label, instead,  
460 taxon-specific qSIP indicated a highly enriched  $^{13}\text{C}$ -AMF signal.

461

#### 462 *Dissecting trophic interactions in the AMF hyphosphere*

463 Paradoxically, AMF are capable of stimulating decomposition of SOM and detritus [37, 38], but do not  
464 have the enzymatic repertoire to decompose SOM themselves. We and others have hypothesized that  
465 AMF collaborate with their soil microbiome to mineralize organic nutrients [43]; previous research shows  
466 the presence of AMF modifies the litter-decomposing microbiome [38] and the hyphosphere microbiome  
467 synergistically increases the amount of nitrogen AMF transfer back to the plant host [70]. The  $^{13}\text{C}$ -AMF  
468 hyphosphere MAGs we identified in this study are a key advance, enabling us to test hypotheses related to  
469 these phenomena and determine the molecular mechanisms that underpin them. Because SIP-  
470 metagenomes target DNA from active organisms that recently consumed an isotopically-labeled substrate,  
471 their genomic content represents the machinery that runs the microbial food web and provides a means to  
472 dissect potential trophic interactions.

473

#### 474 *Predation in the hyphosphere*

475 Using qSIP-estimated MAG atom percent excess, we examined potential trophic interactions in the fungal  
476 hyphosphere based on  $^{13}\text{C}$ -enrichment. Intriguingly, Myxococcota from the poorly-characterized family  
477 Fen-1088 were the most enriched taxa detected in the hyphosphere. While Myxococcota are a known  
478 component of AMF hyphosphere communities [71], their functional role has not been previously  
479 determined. The particularly high atom percent  $^{13}\text{C}$  enrichment of the Fen-1088 family suggests they are  
480 either directly feeding upon C exuded by the AMF, or are predators which target AMF hyphae or other

481 microbes in the AMF hyphosphere. The Myxococcota phylum contains many facultative predators that  
482 can subsist by consuming microbial or plant organic matter [63], and have a broad prey range including  
483 bacteria and fungi [72, 73]. Since our Myxococcota MAGs have high GC content and large genomes, it is  
484 unlikely that they are AMF endosymbionts, which often have reduced genomes. Previous GWAS analysis  
485 indicates that Myxococcota have many prey-specific genes, rather than a general set of antimicrobial  
486 genes, which likely enable them to target a broad prey range [74]. Our analysis of the Fen-1088 MAGs  
487 also points to a large arsenal of proteases that may be used to consume prey, these are also found in many  
488 Myxococcota type species [65]. However, the relative lack of GH18 chitinase genes suggests this family  
489 may not be chitinolytic or may have low chitin degradation efficiency, as highly efficient chitinolytic  
490 organisms are thought to produce multiple types of chitinases [75, 76].

491 While the Fen-1088 MAGs are similar to other Myxococcota genomes, in that they contain a  
492 large array of CAZymes for carbohydrate and polysaccharide degradation, they also contain multiple  
493 copies of genes with CAZyme domains that are uncommon in Myxococcota type species. Most of these  
494 CAZymes are hypothetical proteins, but the presence of these CAZyme domains hints at potential  
495 function. We consistently found two enzyme groups, GH29 and PL6, in Fen-1088 MAGs. The GH29  
496 group is known to contain alpha-fucosidases, which remove terminal L-fucoses from oligosaccharides or  
497 their conjugates[77]. Many biomolecules are fucosylated [78]— polysaccharides, glycoproteins, and  
498 glycolipids can have attached fucoses [77]. AMF hyphae are well-known for exuding glycoproteins and  
499 related compounds, that appear to play a key role in soil carbon stabilization. Fucose can be exuded and  
500 tightly attached to the AMF hyphal surface; in one previous study, fucose represented 3.5-5% of the mass  
501 of poly- and mono-saccharides that were exuded or could be gently hydrolyzed from the fungal surface  
502 [79]. *Rhizophagus irregularis* also exudes fucosylated lipo-chitooligosaccharides [80], which may be  
503 signaling molecules used when establishing a symbiosis with a plant host [81].

504 Much less is known about polyspecific enzyme family PL6; these enzymes are abundant in Fen-  
505 1088, and in all our MAGs with >10% APE-<sup>13</sup>C except the AOA MAG. PL6 contains alginate lyases and  
506 non-alginate lyases [66] that cleave  $\beta(1-4)$  linkages within polysaccharides built from mannuronic and

507 guluronic acids [66], such as alginate produced by brown algae and some bacteria, or between these acids  
508 and other building blocks for non-alginates. While these polysaccharides have been detected in soil, their  
509 origin is difficult to determine. Bacteria in the genera *Pseudomonas* and *Azotobacter* species can produce  
510 a bacterial form of alginate [82]. Little is known about the composition of mycorrhizal exo- and endo-  
511 polysaccharides, so it is not possible to rule out that these enzymes are acting on an AMF-produced  
512 polysaccharide. Mannose, the sugar from which mannuronic acid is built, is abundant in the mono- and  
513 polysaccharides bound to the surface of AMF hyphae [79], but we have no information about how these  
514 monosaccharides are polymerized. Further research on both the polysaccharides in the AMF hyphosphere  
515 and the feeding preferences of the Fen-1088 Myxococcota are needed to determine the nature of this  
516 relationship.

517         Stable isotope measurements can benefit food web studies, where the  $^{13}\text{C}$  enrichment of an  
518 organism is used as a conservative indicator of the  $^{13}\text{C}$  enrichment of the substrate they consume [29, 83].  
519 In some cases, predators can be more enriched than their prey. For example, in a previous qSIP study,  
520 viral DNA was more  $^{13}\text{C}$ -enriched than the microbial host, likely because the host was using more  
521 recently assimilated C to support viral replication [34]. Similarly, in a recent qSIP meta-analysis,  
522 predators assimilated  $^{18}\text{O}$  or  $^{13}\text{C}$  at higher rates than non-predators [29]. We note that isotopic  
523 concentration by predators due to isotopic fractionation (ca. 1 per mil per trophic level for C [83]) is not  
524 relevant to our study, where we have used tracer levels of isotope enrichment. In our study, the Fen-1088  
525 MAGs were more  $^{13}\text{C}$  enrichment than the AMF, even though AMF were the only source of  $^{13}\text{C}$  in the no-  
526 plant compartment. Myxococcota likely became more enriched than the mean AMF enrichment by  
527 consuming  $^{13}\text{C}$ -rich compounds recently transported from the plant host, such as newer hyphae or fresh  
528 exudates. At the time of harvest, plant root bulk enrichment was 41 atom% and AMF hyphae were 23  
529 atom% (estimated by qSIP), but we expect that recently produced hyphae had a higher isotopic signature,  
530 more similar to the plant host (i.e. DNA extracted from all present AMF biomass would include hyphae  
531 produced earlier part of the  $^{13}\text{CO}_2$  labeling period when the plant was less  $^{13}\text{C}$  enriched).

532

533 ***Interactions between AMF and ammonia oxidizing archaea (AOA)***

534 The relatively high  $^{13}\text{C}$  enrichment of the *Nitrosophaera* MAG (12 APE  $^{13}\text{C}$ ) suggests this AOA was  
535 intimately associated with the AMF, or nearby biota that obtained substantial quantities of  $^{13}\text{C}$  from the  
536 AMF (e.g., *Fibrobacterota*, *Opitutaceae*, *Myxococcota*). While AOA are dominantly autotrophic, there is  
537 some evidence they can use organic C [84-86]. Because we did not detect  $^{13}\text{C}$  enrichment in soil from  
538 hyphae-free controls, it is unlikely non-specific subsurface diffusion of  $^{13}\text{CO}_2$  gas contributed to  
539 autotrophic  $^{13}\text{C}$  assimilation. Therefore, we conclude that AMF played a key role in the transport of plant  
540 photosynthate C to the AOA—either through direct (AMF  $\rightarrow$  AOA) or indirect (AMF  $\rightarrow$  other biota  $\rightarrow$   
541 AOA) pathways.

542 The nature of multitrophic interactions between AMF, AOA, and other soil biota remains largely  
543 unknown. AMF can induce changes in AOA community structure [87], with positive, negative, and  
544 negligible effects on AOA abundance [87-90]. Positive interactions between AMF and AOA may be  
545 driven by C supply or hyphosphere soil acidification. Low soil pH promotes AOA abundance and activity  
546 [84]. Negative interactions may be driven by competition for ammonia, which can suppress the AOA  
547 community [88], although this antagonistic relationship may be alleviated in N-rich soil [90]. Because  
548 AOA play an important role in the first step of nitrification [85, 91], AMF effects on AOA abundance and  
549 activity have implications for terrestrial N cycling and  $\text{N}_2\text{O}$  emissions.

550

551 ***Interactions between AMF and decomposers that can potentially degrade fungal or plant biomass***

552 AMF hyphae turnover quickly (5-6 days, [92]) and cycling of this necromass represents a potentially  
553 rapid flow of nutrients and photosynthate C into a large volume of the soil system [43, 93]. Our study's  
554 highly  $^{13}\text{C}$ -enriched MAGs have the genomic potential to degrade AMF fungal biomass. All of the  
555 enriched taxa contain GH109 genes, whose primary reported activity is  $\alpha$ -N-acetylgalactosaminidase  
556 (additional functions may be as yet unknown). Galactose is a component of polysaccharides attached to  
557 the surface of AMF hyphae [79], and a lectin specific to D-galactose or N-acetyl-D-galactosamine  
558 glycoproteins was able to bind strongly to protein extracted from AMF [94]. In particular, *Fibrobacterota*

559 mCT95 has 11 putative chitinase genes (GH18, GH19) and appears to be deriving most of its C from the  
560 AMF (mCT95 has the same APE-<sup>13</sup>C as the AMF), and thus could be performing a chitinolytic function  
561 in this soil food web.

562 All the highly enriched MAGs and many of the low- to medium-enriched MAGs have  
563 enzymatic potential to degrade components of plant biomass. The MAGs from Fibrobacterota and  
564 Verrucomicrobiota family Opitutaceae have isolated relatives that are thought to be involved in  
565 decomposition. Fibrobacterota include cellulose degrading bacteria found in mammal rumens [95],  
566 termite guts [96], anaerobic cellulose reactors [97], and rice paddy soil [98]. The Verrucomicrobiota  
567 family Opitutaceae contains isolates derived from rice patties and insect guts [99-102]. In our previous  
568 study decomposition gene expression in the rhizosphere and detritosphere using metatranscriptomics, we  
569 found that Fibrobacterota and Opitutaceae were two of the three groups that exhibited the highest  
570 decomposition gene expression when both root exudates and detritus were available [103]. Further  
571 examination would be required to determine if the MAGs from this study exhibit similar synergistic  
572 behavior in the AMF hyphosphere, and whether this stimulates the decomposition of plant residues.

573

#### 574 ***Methodological considerations: SIP DNA recovery***

575 The amount of DNA recovered in each SIP density fraction can be a limiting factor for library  
576 construction, especially in the highest and lowest density fractions where only a small portion of total  
577 DNA is captured. In our research, we typically aim for 100 ng DNA per fraction, so that 20 ng may be  
578 reserved for 3 analyses: metagenomic sequencing, 16S rRNA gene and ITS amplicon libraries, and qPCR  
579 assays. To reliably achieve ~100ng DNA in the majority of the fractions collected, we typically  
580 recommend loading 3-5 µg of DNA, because not all DNA added to the density centrifuge tube is  
581 recovered after fraction collection and desalting. Prior to adding non-ionic detergents, we noticed that  
582 DNA recovery appeared to be correlated with the initial amount loaded and hypothesized that DNA was  
583 being lost by an adsorption mechanism. Adsorption of DNA to polypropylene tube walls can potentially  
584 lead to substantial sample loss, especially when DNA is in a high ionic strength solution [48], such as



585 CsCl gradient buffer. Our tests indicate that adding a low concentration of Tween-20 (0.0001%) leads to a  
586 near doubling of DNA yield. Adding Tween-20 may be particularly critical when limited DNA is  
587 available, such as from small samples or low biomass environments. Using this method, samples with 1  
588  $\mu\text{g}$  DNA and below can be more reliably processed and analyzed using metagenomic sequencing  
589 technologies that have low DNA input requirements. Here, we successfully analyzed 350 ng DNA per  
590 hyphosphere DNA sample with a 42% DNA recovery, which was suitable for metagenomic sequencing  
591 of the fractions containing DNA.

592

### 593 *HT-SIP optimization*

594 Automating the SIP process significantly decreased the required operator hours (Table 1) while  
595 simultaneously improving reproducibility and sample recovery. Traditionally, after manually  
596 fractionating a density gradient, an additional 1-2 hours per sample is required to desalt gradient fractions  
597 (nucleic acid purification). Thus, in many research groups, a maximum of 6-8 samples may be processed  
598 per week, a grueling prospect if this pace is kept up week after week. HT-SIP makes it possible to  
599 routinely process 16 samples on a weekly basis, since the overall time to process a group of samples is  
600 decreased by over half, and the laborious “hands-on” tasks are significantly decreased by one-sixth. These  
601 time savings also translate into substantial labor cost savings, which over time can offset the initial cost of  
602 purchasing robotic instruments.

603 In the process of assessing different time saving methods, we attempted different techniques that  
604 were not adopted as part of the final pipeline, but these experiences may benefit others when developing  
605 their own pipelines. In addition to PEG precipitation, we attempted magbead cleanups, which are more  
606 time efficient than PEG if multiple magnetic plates are run in parallel; however in our hands, we found  
607 that PEG precipitations had higher yields. We also assessed if DNA intercalators could be used to  
608 minimize density differences associated with differences in GC content, with the goal of minimizing the  
609 need for separate  $^{12}\text{C}$  controls. Actinomycin D has been shown to reduce the native buoyant density of  
610 DNA with greater effect in GC rich DNA [104], thus theoretically reducing 90% of natural density

611 differences. We found that the high concentrations needed to reduce the density of GC rich DNA also  
612 reduced the quality of the DNA density distribution and the overall DNA recovery. While we did not  
613 pursue further use of intercalators, with some optimization this could be a viable approach. These two  
614 protocols are available in the Supplemental Methods.

615

## 616 **CONCLUSIONS**

617 Increasing the throughput of SIP is needed to promote well-replicated ecological scale studies to  
618 determine the ecophysiology of uncultivated organisms in complex environments. Here, we demonstrated  
619 an automation approach to expedite the most tedious tasks for SIP—fractionation, cleanup,  
620 quantification—that can increase the throughput and decrease the variability of SIP, with DNA recovery  
621 that is comparable to manual SIP processing. Decreasing the hands-on labor needed to run SIP samples  
622 inherently makes high-risk samples more feasible, such as the AMF hyphosphere samples we analyzed,  
623 where we had limited soil volume, low bulk atom percent enrichment and minimal separation based on  
624 total DNA density curves. The highly <sup>13</sup>C-enriched hyphosphere MAGs identified in this study highlight  
625 the potential for trophic interactions in this zone, which includes predation, decomposition of fungal or  
626 plant biomass, and ammonia oxidation. In combination with other ‘-omics technologies, such as  
627 metatranscriptomics or proteomics, these MAGs will provide an important genomic resource for future  
628 experiments exploring interactions between AMF and their native microbiome.

629

## 630 **ACKNOWLEDGEMENTS**

631 We thank Steve Kubala for assistance programming the robotic methods, Craig See for assistance with  
632 manual refractometry, G. Mike Allen for SIP technical assistance, and the JGI IMG and metagenomics  
633 teams for assistance with data processing (Neha Varghese, Alicia Clum, Marcel Huntemann, Tatiparthi  
634 Reddy, Supratim Mukherjee). Development of the HT-SIP pipeline was sponsored by the Joint Genome  
635 Institute through an Emerging Technologies Opportunities Program award (DOI:  
636 10.46936/10.25585/60008401) to J.P.R. Testing of experimental samples on the LLNL HT-SIP pipeline

637 was supported by the U.S. Department of Energy Office of Science, Office of Biological and  
638 Environmental Research (BER) Genomic Science Program (GSP) ‘Microbes Persist’ Scientific Focus  
639 Area award SWC1632 to J.P.R. The <sup>13</sup>CO<sub>2</sub> plant-AMF experiment was supported by DOE BER GSP  
640 awards DE-SC0016247 and DE-SC0020163 to M.K.F, and hyphosphere-SIP metagenomics sequencing  
641 and analysis was supported by DOE BER Early Career award SCW1711 to E.E.N. Work at Lawrence  
642 Livermore National Laboratory was conducted under the auspices of the U.S. DOE under Contract DE-  
643 AC52-07NA27344. The work conducted by the U.S. Department of Energy Joint Genome Institute  
644 (<https://ror.org/04xm1d337>), a DOE Office of Science User Facility, is supported by the Office of Science  
645 of the U.S. Department of Energy operated under Contract No. DE-AC02-05CH11231.

646

#### 647 **CONFLICTS OF INTEREST**

648 The authors declare no conflicts of interest.

649

650 **FIGURE CAPTIONS**

651 **Figure 1. Comparison of manual versus automated fractionation of SIP density gradients.**

652 Fractionation is the process of dividing a SIP density gradient into multiple fractions, where the initial  
653 fractions at the bottom of the tube are the heaviest and the final fractions at the top of the tube are the  
654 lightest. Buoyant density (g/ml) for each fraction is measured via refractometry and is represented by a  
655 single dot. **(A)** For “manual” fractionation, 22 independent density gradients were fractionated by visually  
656 counting and collecting droplets in microcentrifuge tubes using the method described in Blazewicz et al  
657 [17]. The number of fractions collected from manual density gradient was variable (range 15-27 fractions  
658 per gradient); only fractions 2-19 are displayed. **(B)** For automated fractionation, 24 independent density  
659 gradients were fractionated robotically using an Agilent Technologies fraction collector, which  
660 automatically divides the gradients into fractions of a set volume (~236  $\mu$ l) and dispenses them into a 96-  
661 well plate. Automated density gradients consistently produced 22 fractions per gradient. Fractions at the  
662 beginning and end of the gradient (fractions 1, 20-22) were excluded as these densities are altered by the  
663 water used to displace the gradient and are not typically used for molecular analysis.

664

665 **Figure 2. DNA recovery comparison for manual and semi-automated PEG precipitation methods,**  
666 **and the impact of adding a non-ionic detergent (Tween-20) to the SIP gradient buffer.** After a

667 density gradient is fractionated, each fraction needs to be desalted prior to quantification and sequencing  
668 analysis, which can be accomplished using nucleic acid precipitations. **(A)** We compared “manual” PEG  
669 precipitations (n=3 SIP gradients), where each fraction is precipitated in microcentrifuge tubes by an  
670 individual (as per Blazewicz et al. [17]), and semi-automated or “robot” PEG precipitations (n=3 SIP  
671 gradients), where a Hamilton STAR liquid handling robot performs the precipitations in 96-well plates.  
672 This process is semi-automated because some steps require assistance from an individual (e.g.,  
673 transferring plates to a centrifuge for DNA sedimentation). **(B)** We tested how adding Tween-20 to the  
674 density gradient mixture impacts DNA recovery for a large SIP experiment analyzing soil DNA; all  
675 samples were processed semi-automatically by the robot. Tween-20 was added to a subset of the samples

676 (+Tween, n = 38 SIP gradients) or processed using our standard density gradient buffer without Tween-20  
677 (–Tween, n = 63 SIP gradients). Both experiments were conducted using 4 µg soil DNA per SIP gradient;  
678 recovery was calculated by summing recovered DNA (measured by Picogreen) in the recovered density  
679 fractions post-cleanup and dividing by the initial DNA input. Error bars represent the standard error of the  
680 mean.

681  
682 **Figure 3: <sup>13</sup>C-Hyphosphere Metagenome Assembled Genomes (MAGs) isolated by SIP-**  
683 **metagenomics.** Concentration versus fraction density of (A) total DNA extracted and SIP fractionated  
684 from a <sup>13</sup>C-hyphosphere soil (red lines) and <sup>12</sup>C-hyphosphere control soil (blue lines); n=3. Dashed lines  
685 are the weighted average density (WAD) of the DNA of the replicate gradients for each isotope. Within  
686 this gradient, we used qSIP to estimate taxon-specific DNA masses for (B) the AMF host *Rhizophagus*  
687 *intraradices*, and two MAGs recovered from the AMF hyphosphere: (C) a Myxococcota MAG  
688 (mCT241\_Fen-1088) (the most <sup>13</sup>C-enriched organism detected), and (D) an archaeal ammonia oxidizer  
689 (mCT2\_Nitrososphaera). Taxon-specific DNA masses were estimated by multiplying a fraction's total  
690 DNA mass by taxon relative abundance (e.g., MAG counts divided by metagenomic library counts). (E)  
691 Estimated median atom percent excess (APE) of all assembled MAGs, which were calculated based on  
692 the difference in weighted average density between <sup>13</sup>C-hyphosphere samples and <sup>12</sup>C-hyphosphere  
693 control samples. Red bars indicate the 212 MAGs that had significantly greater <sup>13</sup>C enrichment than 0  
694 (lower 90% CI bound greater than 0), and blue bars indicate the MAGs that were unenriched (lower 90%  
695 CI bound below 0). The dashed gray line indicates the APE of the AMF, *Rhizophagus intraradices*, which  
696 supplied <sup>13</sup>C to the hyphosphere chamber. Taxa are grouped by phylum, and letters indicate the APE of  
697 the taxa shown in panels B-D.

698  
699 **Figure 4: Ranked enrichment of highly enriched MAGs in the AMF <sup>13</sup>C-hyphosphere, as estimated**  
700 **by qSIP.** MAGs displayed have >5% atom percent excess (APE) <sup>13</sup>C and are colored by phylum  
701 affiliation. Dashed line indicates the APE-<sup>13</sup>C of the AMF, *Rhizophagus intraradices*. Error bars represent

702 the 90% confidence interval. A full list of MAGs and their isotopic enrichment is available in  
703 Supplemental Table 3.

704

705 **Figure 5: Genomic comparison of CAZy family homologs identified in Myxococcota MAGs**

706 **assembled in this study.** Rows indicate the number of gene homologs (red-blue color scale) detected per  
707 CAZy family, columns indicate the associated MAGs. Atom percent excess  $^{13}\text{C}$  (APE- $^{13}\text{C}$ ) estimated by  
708 qSIP is presented in the top row (yellow-purple-black color scale). Columns and rows were clustered  
709 using one-dimensional hierarchical clustering based on genomic content. CAZy families displayed had  
710 significantly more or less genes detected in the Fen-1088 MAGs compared to the rest of the Myxococcota  
711 MAGs (student's t-test,  $p < 0.05$ ); full results are available in Supplemental Table S6. Acronyms: GH =  
712 glycoside hydrolase; PL = polysaccharide lyase; CBM = carbohydrate binding module; GT =  
713 glycosyltransferase; AA = auxiliary activity.

| SIP Processing Steps               | Manual Time (hours) |           | Automated Time (hours) |           |
|------------------------------------|---------------------|-----------|------------------------|-----------|
|                                    | Hands-on            | Total     | Hands-on               | Total     |
| Fraction Collection                | 1                   | 1         | 0.2                    | 0.6       |
| Sample Cleanup                     | 0.4                 | 1         | 0.04†                  | 0.5†      |
| DNA Quantification                 | 0.5                 | 0.6       | 0.06†                  | 0.13†     |
| Total Time (per 1 sample)          | 1.9                 | 2.6       | 0.3†                   | 1.2†      |
| <b>Batch Time (per 16 samples)</b> | <b>30</b>           | <b>42</b> | <b>4.8</b>             | <b>20</b> |

714

715 **Table 1. Time comparison for manual versus automated SIP fractionation, cleanup, and DNA**

716 **quantification.** Estimates are based on processing 22 fractions per SIP tube. The “Hands-on” columns

717 indicate the time an individual must actively manipulate the samples, while “total” columns indicate the

718 total time required for the entire process. Manual cleanup and quantification time estimates are based on

719 processing a single SIP gradient and assume maximum processing speed. Automated fraction cleanup

720 time is based on the time required to fractionate a single tube using the Agilent Infinity Fraction

721 Collector. Automated sample cleanup and DNA quantification times are based on the processing times for

722 the Hamilton STAR liquid handling robots. The † symbol indicates that 16 SIP gradients are processed

723 simultaneously in 4 plates (4 gradients per plate), and the “per 1 sample” times are calculated by dividing

724 the total time by 16. “Batch” processing times are the times required to process 16 density gradients.

725

726 **REFERENCES**

- 727
- 728 1. Slysz GW, Steinke L, Ward DM, Klatt CG, Clauss TR, Purvine SO, et al. Automated  
729 data extraction from in situ protein-stable isotope probing studies. *Journal of proteome*  
730 *research*. 2014;13(3):1200-10.
  - 731 2. Radajewski S, Ineson P, Parekh NR, Murrell J. Stable-isotope probing as a tool in  
732 microbial ecology. *Nature*. 2000;403(10):646-9.
  - 733 3. Manefield M, Whiteley AS, Griffiths R, Bailey MJ. RNA Stable Isotope Probing, a  
734 Novel Means of Linking Microbial Community Function to Phylogeny. *Appl Environ*  
735 *Microbiol*. 2002.
  - 736 4. Baran R, Reindl W, Northen TR. Mass spectrometry based metabolomics and enzymatic  
737 assays for functional genomics. *Curr Opin Microbiol*. 2009;12(5):547-52; doi:  
738 <https://doi.org/10.1016/j.mib.2009.07.004>.
  - 739 5. Dumont MG, Hernández García M. *Stable Isotope Probing: Methods and Protocols*.  
740 Totowa, NJ, US: Humana Press; 2019.
  - 741 6. Koch BJ, McHugh TA, Hayer M, Schwartz E, Blazewicz SJ, Dijkstra P, et al. Estimating  
742 taxon-specific population dynamics in diverse microbial communities. *Ecosphere*.  
743 2018;9(1); doi: 10.1002/ecs2.2090.
  - 744 7. Pett-Ridge J, Weber PK. *NanoSIP: NanoSIMS application for microbial biology*. 2nd  
745 edn: Humana Press; 2021.
  - 746 8. Murrell JC, Whiteley AS. *Stable Isotope Probing and Related Technologies*. Washington  
747 DC: ASM Press; 2011.
  - 748 9. Pepe-Ranney C, Campbell AN, Koechli CN, Berthrong S, Buckley DH. Unearthing the  
749 Ecology of Soil Microorganisms Using a High Resolution DNA-SIP Approach to  
750 Explore Cellulose and Xylose Metabolism in Soil. *Front Microbiol*. 2016;7(94):626; doi:  
751 10.3389/fmicb.2016.00703.
  - 752 10. Rangel-Castro JI, Killham K, Ostle N, Nicol GW, Anderson IC, Scrimgeour CM, et al.  
753 Stable isotope probing analysis of the influence of liming on root exudate utilization by  
754 soil microorganisms. *Environmental Microbiology*. 2005;7(6):828-38; doi:  
755 10.1111/emi.2005.7.issue-6.
  - 756 11. Vandenkoornhuysen P, Mahé S, Ineson P, Staddon P, Ostle N, Cliquet J-B, et al. Active  
757 root-inhabiting microbes identified by rapid incorporation of plant-derived carbon into  
758 RNA. *Proc Natl Acad Sci USA*. 2007;104(43):16970-5; doi: 10.1073/pnas.0705902104.
  - 759 12. Sieradzki ET, Morando M, Fuhrman JA. Metagenomics and Quantitative Stable Isotope  
760 Probing Offer Insights into Metabolism of Polycyclic Aromatic Hydrocarbon Degradors  
761 in Chronically Polluted Seawater. *mSystems*. 2021;6(3):e00245-21; doi:  
762 10.1128/msystems.00245-21 PMID - 33975968.
  - 763 13. Neufeld JD, Schäfer H, Cox MJ, Boden R, McDonald IR, Murrell JC. Stable-isotope  
764 probing implicates *Methylophaga* spp and novel Gammaproteobacteria in marine  
765 methanol and methylamine metabolism. *ISME J*. 2007;1(6):480-91; doi:  
766 10.1038/ismej.2007.65 PMID - 18043650.
  - 767 14. Jia Z, Conrad R. Bacteria rather than Archaea dominate microbial ammonia oxidation in  
768 an agricultural soil. *Environ Microbiol*. 2009; doi: 10.1111/j.1462-2920.2009.01891.x.
  - 769 15. Buckley D, Huangyutitham V, Hsu S, Nelson T. Stable Isotope Probing with <sup>15</sup>N<sub>2</sub>  
770 Reveals Novel Noncultivated Diazotrophs in Soil. *Appl Environ Microbiol*.  
771 2007;73(10):3196-204; doi: 10.1128/AEM.02610-06.



- 772 16. Angel R, Panhölzl C, Gabriel R, Herbold C, Wanek W, Richter A, et al. Application of  
773 stable-isotope labelling techniques for the detection of active diazotrophs. *Environ*  
774 *Microbiol.* 2018;20(1):44-61; doi: 10.1111/1462-2920.13954 PMID - 29027346.
- 775 17. Blazewicz SJ, Schwartz E, Firestone MK. Growth and death of bacteria and fungi  
776 underlie rainfall-induced carbon dioxide pulses from seasonally dried soil. *Ecology.*  
777 2014;95(5):1162-72.
- 778 18. Blazewicz SJ, Hungate BA, Koch BJ, Nuccio EE, Morrissey E, Brodie EL, et al. Taxon-  
779 specific microbial growth and mortality patterns reveal distinct temporal population  
780 responses to rewetting in a California grassland soil. *ISME J.* 2020;14(6):1520-32; doi:  
781 10.1038/s41396-020-0617-3.
- 782 19. Barnett SE, Youngblut ND, Buckley DH. Stable Isotope Probing, Methods and Protocols.  
783 *Methods in Molecular Biology.* 2019;2046:109-28; doi: 10.1007/978-1-4939-9721-3\_9  
784 PMID - 31407300.
- 785 20. Hungate BA, Mau RL, Schwartz E, Caporaso JG, Dijkstra P, Van Gestel N, et al.  
786 Quantitative Microbial Ecology Through Stable Isotope Probing. *Appl Environ*  
787 *Microbiol.* 2015; doi: 10.1128/AEM.02280-15
- 788 21. Blazewicz SJ, Schwartz E. Dynamics of (18)O incorporation from H<sub>2</sub>(18)O into soil  
789 microbial DNA. *Microb Ecol.* 2011;61(4):911-6; doi: 10.1007/s00248-011-9826-7.
- 790 22. Schwartz E, Hayer M, Hungate BA, Koch BJ, McHugh TA, Mercurio W, et al. Stable  
791 isotope probing with 18O-water to investigate microbial growth and death in  
792 environmental samples. *Curr Opin Biotechnol.* 2016;41:14-8; doi:  
793 10.1016/j.copbio.2016.03.003 PMID - 27035052.
- 794 23. Trubl G, Kimbrel JA, Liquet-Gonzalez J, Nuccio EE, Weber PK, Pett-Ridge J, et al.  
795 Active virus-host interactions at sub-freezing temperatures in Arctic peat soil.  
796 *Microbiome.* 2021;9(1):208; doi: 10.1186/s40168-021-01154-2 PMID - 34663463.
- 797 24. Morrissey EM, Mau RL, Hayer M, Liu X-JA, Schwartz E, Dijkstra P, et al. Evolutionary  
798 history constrains microbial traits across environmental variation. *Nat Ecol Evol.*  
799 2019;3(7):1064-9; doi: 10.1038/s41559-019-0918-y PMID - 31209289.
- 800 25. Li J, Mau RL, Dijkstra P, Koch BJ, Schwartz E, Liu X-JA, et al. Predictive genomic traits  
801 for bacterial growth in culture versus actual growth in soil. *ISME J.* 2019;13(9):2162-72;  
802 doi: 10.1038/s41396-019-0422-z PMID - 31053828.
- 803 26. Wang C, Morrissey EM, Mau RL, Hayer M, Piñeiro J, Mack MC, et al. The temperature  
804 sensitivity of soil: microbial biodiversity, growth, and carbon mineralization. *ISME J.*  
805 2021;15(9):2738-47; doi: 10.1038/s41396-021-00959-1 PMID - 33782569.
- 806 27. Purcell AM, Hayer M, Koch BJ, Mau RL, Blazewicz SJ, Dijkstra P, et al. Decreased  
807 growth of wild soil microbes after 15 years of transplant-induced warming in a montane  
808 meadow. *Global Change Biol.* 2022;28(1):128-39; doi: 10.1111/gcb.15911 PMID -  
809 34587352.
- 810 28. Stone BW, Li J, Koch BJ, Blazewicz SJ, Dijkstra P, Hayer M, et al. Nutrients cause  
811 consolidation of soil carbon flux to small proportion of bacterial community. *Nat*  
812 *Commun.* 2021;12(1):3381; doi: 10.1038/s41467-021-23676-x PMID - 34099669.
- 813 29. Hungate BA, Marks JC, Power ME, Schwartz E, Groenigen KJv, Blazewicz SJ, et al. The  
814 Functional Significance of Bacterial Predators. *mBio.* 2021;12(2):e00466-21; doi:  
815 10.1128/mbio.00466-21 PMID - 33906922.
- 816 30. Wilhelm RC, Pepe-Ranney C, Weisenhorn P, Lipton M, Buckley DH. Competitive  
817 Exclusion and Metabolic Dependency among Microorganisms Structure the Cellulose

- 818 Economy of an Agricultural Soil. *mBio*. 2021;12(1); doi: 10.1128/mbio.03099-20 PMID  
819 - 33402535.
- 820 31. Greenlon A, Sieradzki E, Zablocki O, Koch BJ, Foley MM, Kimbrel JA, et al.  
821 Quantitative stable-isotope probing (qSIP) with metagenomics links microbial physiology  
822 and activity to soil moisture in Mediterranean-climate grassland ecosystems. *bioRxiv*.  
823 2022:2022.05.02.490339; doi: 10.1101/2022.05.02.490339.
- 824 32. Eyice Ö, Namura M, Chen Y, Mead A, Samavedam S, Schäfer H. SIP metagenomics  
825 identifies uncultivated Methylophilaceae as dimethylsulphide degrading bacteria in soil  
826 and lake sediment. *ISME J*. 2015;9(11):2336-48; doi: 10.1038/ismej.2015.37 PMID -  
827 25822481.
- 828 33. Barnett SE, Youngblut ND, Koechli CN, Buckley DH. Multisubstrate DNA stable  
829 isotope probing reveals guild structure of bacteria that mediate soil carbon cycling. *Proc*  
830 *Natl Acad Sci USA*. 2021;118(47):e2115292118; doi: 10.1073/pnas.2115292118 PMID -  
831 34799453.
- 832 34. Starr EP, Shi S, Blazewicz SJ, Koch BJ, Probst AJ, Hungate BA, et al. Stable-Isotope-  
833 Informed, Genome-Resolved Metagenomics Uncovers Potential Cross-Kingdom  
834 Interactions in Rhizosphere Soil. *Mosphere*. 2021;6(5):e00085-21; doi:  
835 10.1128/msphere.00085-21 PMID - 34468166.
- 836 35. Sieradzki ET, Koch BJ, Greenlon A, Sachdeva R, Malmstrom RR, Mau RL, et al.  
837 Measurement Error and Resolution in Quantitative Stable Isotope Probing: Implications  
838 for Experimental Design. *mSystems*. 2020;5(4):e00151-20; doi:  
839 10.1128/msystems.00151-20 PMID - 32694124.
- 840 36. Smith SE, Read DJ. *Mycorrhizal Symbiosis*. New York: Academic Press; 2008.
- 841 37. Barea JM, Azcon R, Azcon-Aguilar C. Mycorrhizosphere interactions to improve plant  
842 fitness and soil quality. *Antonie Van Leeuwenhoek International Journal of General and*  
843 *Molecular Microbiology*. 2002;81(1-4):343-51; doi: 10.1023/a:1020588701325.
- 844 38. Nuccio EE, Hodge A, Pett-Ridge J, Herman DJ, Weber PK, Firestone MK. An arbuscular  
845 mycorrhizal fungus significantly modifies the soil bacterial community and nitrogen  
846 cycling during litter decomposition. *Environ Microbiol*. 2013;15(6):1870-81; doi:  
847 10.1111/1462-2920.12081.
- 848 39. Kakouridis A, Hagen JA, Kan MP, Mambelli S, Feldman LJ, Herman DJ, et al. Routes to  
849 Roots: Direct Evidence of Water Transport by Arbuscular Mycorrhizal Fungi to Host  
850 Plants. *New Phytol*. 2022; doi: 10.1111/nph.18281 PMID - 35633108.
- 851 40. Hodge A, Campbell CD, Fitter AH. An arbuscular mycorrhizal fungus accelerates  
852 decomposition and acquires nitrogen directly from organic material. *Nature*.  
853 2001;413(6853):297-9.
- 854 41. Atul-Nayyar A, Hamel C, Hanson K, Germida J. The arbuscular mycorrhizal symbiosis  
855 links N mineralization to plant demand. *Mycorrhiza*. 2009;19(4):239-46; doi:  
856 10.1007/s00572-008-0215-0.
- 857 42. Cheng L, Booker FL, Tu C, Burkey KO, Zhou L, Shew HD, et al. Arbuscular  
858 mycorrhizal fungi increase organic carbon decomposition under elevated CO<sub>2</sub>. *Science*.  
859 2012;337(6098):1084-7; doi: 10.1126/science.1224304.
- 860 43. Frey SD. Mycorrhizal Fungi as Mediators of Soil Organic Matter Dynamics. *Annu Rev*  
861 *Ecol, Evol Syst*. 2019;50:237-59.
- 862 44. Herman DJ, Firestone MK, Nuccio E, Hodge A. Interactions between an arbuscular  
863 mycorrhizal fungus and a soil microbial community mediating litter decomposition.

- 864 FEMS Microbiology Ecology. 2012;80(1):236-47; doi: 10.1111/j.1574-  
865 6941.2011.01292.x.
- 866 45. Dodd JC, Boddington CL, Rodriguez A, Gonzalez-Chavez C, Mansur I. Mycelium of  
867 Arbuscular Mycorrhizal fungi (AMF) from different genera: form, function and  
868 detection. *Plant Soil*. 2000;226(2):131-51; doi: 10.1023/a:1026574828169.
- 869 46. Buckley DH, Huangyutitham V, Hsu S-F, Nelson TA: Stable Isotope Probing with <sup>15</sup>N2  
870 Reveals Novel Noncultivated Diazotrophs in Soil. In: *Applied and Environmental*  
871 *Microbiology*. vol. 73; 2007: 3196-204.
- 872 47. Neufeld JD, Vohra J, Dumont MG, Lueders T, Manefield M, Friedrich MW, et al. DNA  
873 stable-isotope probing. *Nature Protocols*. 2007;2(4):860-6; doi: 10.1038/nprot.2007.109  
874 PMID - 17446886.
- 875 48. Gaillard C, Strauss F. Avoiding adsorption of DNA to polypropylene tubes and  
876 denaturation of short DNA fragments. *Technical Tips Online*. 1998;3(1):63-5; doi:  
877 10.1016/s1366-2120(08)70101-6.
- 878 49. Garvin AM, Fritsch A. Purifying and Concentrating Genomic DNA from Mock Forensic  
879 Samples Using Millipore Amicon Filters. *J Forensic Sci*. 2013;58(s1):S173-S5; doi:  
880 10.1111/1556-4029.12002 PMID - 23082821.
- 881 50. Illumina. NextSeq 1000 and 2000 Denature and Dilute Libraries Guide (1000000139235  
882 v3).
- 883 51. Hofmeyr S, Egan R, Georganas E, Copeland AC, Riley R, Clum A, et al. Terabase-scale  
884 metagenome coassembly with MetaHipMer. *Scientific Reports*. 2020;10(1):10689; doi:  
885 10.1038/s41598-020-67416-5 PMID - 32612216.
- 886 52. Nurk S, Meleshko D, Korobeynikov A, Pevzner PA. metaSPAdes: a new versatile  
887 metagenomic assembler. *Genome Res*. 2017;27(5):824-34; doi: 10.1101/gr.213959.116  
888 PMID - 28298430.
- 889 53. Bushnell B. BBTools Software Package. [sourceforge.net/projects/bbmap/](https://sourceforge.net/projects/bbmap/) Accessed.
- 890 54. Uritskiy GV, DiRuggiero J, Taylor J. MetaWRAP—a flexible pipeline for genome-  
891 resolved metagenomic data analysis. *Microbiome*. 2018;6(1):1-13; doi: 10.1186/s40168-  
892 018-0541-1.
- 893 55. Parks DH, Imelfort M, Skennerton CT, Hugenholtz P, Tyson GW. CheckM: assessing the  
894 quality of microbial genomes recovered from isolates, single cells, and metagenomes.  
895 *Genome Res*. 2015;25(7):1043-55.
- 896 56. Chaumeil PA, Mussig AJ, hugenholtz p, Parks DH. GTDB-Tk: a toolkit to classify  
897 genomes with the Genome Taxonomy Database. *Bioinformatics*. 2020;36(6):1925-7.
- 898 57. Bowers RM, Kyrpides NC, Stepanauskas R, Harmon-Smith M, Doud D, Reddy TBK, et  
899 al. Minimum information about a single amplified genome (MISAG) and a metagenome-  
900 assembled genome (MIMAG) of bacteria and archaea. *Nat Biotechnol*. 2017;35(8):725-  
901 31; doi: 10.1038/nbt.3893.
- 902 58. Chen ECH, Morin E, Beaudet D, Noel J, Yildirim G, Ndikumana S, et al. High  
903 intraspecific genome diversity in the model arbuscular mycorrhizal symbiont  
904 *Rhizophagus irregularis*. *New Phytol*. 2018;220(4):1161-71; doi: 10.1111/nph.14989  
905 PMID - 29355972.
- 906 59. Wattam AR, Davis JJ, Assaf R, Boisvert S, Brettin T, Bun C, et al. Improvements to  
907 PATRIC, the all-bacterial Bioinformatics Database and Analysis Resource Center.  
908 *Nucleic Acids Res*. 2016;45(D1):D535-D42; doi: 10.1093/nar/gkw1017.

- 909 60. Aramaki T, Blanc-Mathieu R, Endo H, Ohkubo K, Kanehisa M, Goto S, et al.  
910 KofamKOALA: KEGG ortholog assignment based on profile HMM and adaptive score  
911 threshold. *Bioinformatics*. 2019;36(7):2251-2; doi: 10.1093/bioinformatics/btz859 PMID  
912 - 31742321.
- 913 61. Yin Y, Mao X, Yang J, Chen X, Mao F, Xu Y. dbCAN: a web resource for automated  
914 carbohydrate-active enzyme annotation. *Nucleic Acids Res*. 2012;40(W1):W445-W51;  
915 doi: 10.1093/nar/gks479.
- 916 62. Rawlings ND, Barrett AJ, Thomas PD, Huang X, Bateman A, Finn RD. The MEROPS  
917 database of proteolytic enzymes, their substrates and inhibitors in 2017 and a comparison  
918 with peptidases in the PANTHER database. *Nucleic Acids Res*. 2017;46(Database  
919 issue):gkx1134-; doi: 10.1093/nar/gkx1134 PMID - 29145643.
- 920 63. Shimkets LJ. *Myxobacteria, Development and Cell Interactions*. Springer Ser Mol  
921 Biology. 1984:91-107; doi: 10.1007/978-1-4613-8280-5\_4.
- 922 64. Parks DH, Chuvochina M, Rinke C, Mussig AJ, Chaumeil P-A, Hugenholtz P. GTDB: an  
923 ongoing census of bacterial and archaeal diversity through a phylogenetically consistent,  
924 rank normalized and complete genome-based taxonomy. *Nucleic Acids Res*.  
925 2021;50(D1):D785-D94; doi: 10.1093/nar/gkab776 PMID - 34520557.
- 926 65. Murphy CL, Yang R, Decker T, Cavalliere C, Andreev V, Bircher N, et al. Genomes of  
927 Novel Myxococota Reveal Severely Curtailed Machineries for Predation and Cellular  
928 Differentiation. *Appl Environ Microbiol*. 2021;87(23):e01706-21; doi:  
929 10.1128/aem.01706-21 PMID - 34524899.
- 930 66. Mathieu S, Henrissat B, Labre F, Skjåk-Bræk G, Helbert W. Functional Exploration of  
931 the Polysaccharide Lyase Family PL6. *PLoS ONE*. 2016;11(7):e0159415; doi:  
932 10.1371/journal.pone.0159415 PMID - 27438604.
- 933 67. Reji L, Cardarelli EL, Boye K, Bargar JR, Francis CA. Diverse ecophysiological  
934 adaptations of subsurface Thaumarchaeota in floodplain sediments revealed through  
935 genome-resolved metagenomics. *ISME J*. 2022;16(4):1140-52; doi: 10.1038/s41396-021-  
936 01167-7 PMID - 34873295.
- 937 68. Gummadi SN, Panda T. Purification and biochemical properties of microbial  
938 pectinases—a review. *Process Biochem*. 2003;38(7):987-96; doi: 10.1016/s0032-  
939 9592(02)00203-0.
- 940 69. Elboutachfai R, Delattre C, Petit E, Michaud P. Polyglucuronic acids: Structures,  
941 functions and degrading enzymes. *Carbohydr Polym*. 2011;84(1):1-13; doi:  
942 10.1016/j.carbpol.2010.10.063.
- 943 70. Hestrin R, Hammer EC, Mueller CW, Lehmann J. Synergies between mycorrhizal fungi  
944 and soil microbial communities increase plant nitrogen acquisition. *Communications  
945 Biology*. 2019;2(1):1-9; doi: 10.1038/s42003-019-0481-8.
- 946 71. Emmett BD, Lévesque-Tremblay V, Harrison MJ. Conserved and reproducible bacterial  
947 communities associate with extraradical hyphae of arbuscular mycorrhizal fungi. *ISME J*.  
948 2021:1-13; doi: 10.1038/s41396-021-00920-2 PMID - 33649552.
- 949 72. Morgan AD, MacLean RC, Hillesland KL, Velicer GJ. Comparative Analysis of  
950 *Myxococcus* Predation on Soil Bacteria. *Appl Environ Microbiol*. 2010;76(20):6920-7;  
951 doi: 10.1128/aem.00414-10 PMID - 20802074.
- 952 73. Livingstone PG, Mophew RM, Whitworth DE. *Myxobacteria Are Able to Prey Broadly  
953 upon Clinically-Relevant Pathogens, Exhibiting a Prey Range Which Cannot Be*

- 954 Explained by Phylogeny. *Front Microbiol.* 2017;8:1593; doi: 10.3389/fmicb.2017.01593  
955 PMID - 28878752.
- 956 74. Sutton D, Livingstone PG, Furness E, Swain MT, Whitworth DE. Genome-Wide  
957 Identification of Myxobacterial Predation Genes and Demonstration of Formaldehyde  
958 Secretion as a Potentially Predation-Resistant Trait of *Pseudomonas aeruginosa*. *Front*  
959 *Microbiol.* 2019;10:2650; doi: 10.3389/fmicb.2019.02650 PMID - 31798566.
- 960 75. Beier S, Bertilsson S. Bacterial chitin degradation—mechanisms and ecophysiological  
961 strategies. *Front Microbiol.* 2013;4:149; doi: 10.3389/fmicb.2013.00149 PMID -  
962 23785358.
- 963 76. Svitil AL, Chadhain S, Moore JA, Kirchman DL. Chitin Degradation Proteins Produced  
964 by the Marine Bacterium *Vibrio harveyi* Growing on Different Forms of Chitin. *Appl*  
965 *Environ Microbiol.* 1997;63(2):408-13; doi: 10.1128/aem.63.2.408-413.1997 PMID -  
966 16535505.
- 967 77. Li T, Li M, Hou L, Guo Y, Wang L, Sun G, et al. Identification and characterization of a  
968 core fucosidase from the bacterium *Elizabethkingia meningoseptica*. *J Biol Chem.*  
969 2018;293(4):1243-58; doi: 10.1074/jbc.m117.804252 PMID - 29196602.
- 970 78. Ihara H, Hanashima S, Tsukamoto H, Yamaguchi Y, Taniguchi N, Ikeda Y.  
971 Difucosylation of chitoooligosaccharides by eukaryote and prokaryote  $\alpha$ 1,6-  
972 fucosyltransferases. *Biochimica Et Biophysica Acta Bba - Gen Subj.*  
973 2013;1830(10):4482-90; doi: 10.1016/j.bbagen.2013.05.013 PMID - 23688399.
- 974 79. Hooker JE, Piatti P, Cheshire MV, Watson CA. Polysaccharides and monosaccharides in  
975 the hyphosphere of the arbuscular mycorrhizal fungi *Glomus E3* and *Glomus tenue*. *Soil*  
976 *Biol Biochem.* 2007;39(2):680-3; doi: 10.1016/j.soilbio.2006.08.006.
- 977 80. Rush TA, Puech-Pagès V, Bascaules A, Jargeat P, Maillet F, Haouy A, et al. Lipo-  
978 chitoooligosaccharides as regulatory signals of fungal growth and development. *Nat*  
979 *Commun.* 2020;11(1):3897; doi: 10.1038/s41467-020-17615-5 PMID - 32753587.
- 980 81. Maillet F, Poinsot V, André O, Puech-Pagès V, Haouy A, Gueunier M, et al. Fungal  
981 lipochitoooligosaccharide symbiotic signals in arbuscular mycorrhiza. *Nature.*  
982 2011;469(7328):58-63; doi: 10.1038/nature09622 PMID - 21209659.
- 983 82. Rehm BHA, Valla S. Bacterial alginates: biosynthesis and applications. *Appl Microbiol*  
984 *Biotechnol.* 1997;48(3):281-8; doi: 10.1007/s002530051051 PMID - 9352672.
- 985 83. Peterson BJ, Fry B. Stable Isotopes in Ecosystem Studies. *Annu Rev Ecol Syst.*  
986 1987;18(1):293-320; doi: 10.1146/annurev.es.18.110187.001453.
- 987 84. Nicol GW, Leininger S, Schleper C, Prosser JI. The influence of soil pH on the diversity,  
988 abundance and transcriptional activity of ammonia oxidizing archaea and bacteria.  
989 *Environ Microbiol.* 2008;10(11):2966-78; doi: 10.1111/j.1462-2920.2008.01701.x.
- 990 85. Zhang L-M, Offre PR, He J-Z, Verhamme DT, Nicol GW, Prosser JI. Autotrophic  
991 ammonia oxidation by soil thaumarchaea. *Proc Natl Acad Sci USA.* 2010;107(40):17240-  
992 5; doi: 10.1073/pnas.1004947107 PMID - 20855593.
- 993 86. Tourna M, Stieglmeier M, Spang A, Könneke M, Schintlmeister A, Urich T, et al.  
994 *Nitrososphaera viennensis*, an ammonia oxidizing archaeon from soil. *Proc Natl Acad Sci*  
995 *USA.* 2011;108(20):8420-5; doi: 10.1073/pnas.1013488108 PMID - 21525411.
- 996 87. Chen Y-L, Chen B-D, Hu Y-J, Li T, Zhang X, Hao Z-P, et al. Direct and indirect  
997 influence of arbuscular mycorrhizal fungi on abundance and community structure of  
998 ammonia oxidizing bacteria and archaea in soil microcosms. *Pedobiologia.* 2013;56(4-  
999 6):205-12; doi: 10.1016/j.pedobi.2013.07.003.

- 1000 88. Bukovská P, Bonkowski M, Konvalinková T, Beskid O, Hujslová M, Püschel D, et al.  
1001 Utilization of organic nitrogen by arbuscular mycorrhizal fungi—is there a specific role  
1002 for protists and ammonia oxidizers? *Mycorrhiza*. 2018;28(3):269-83; doi:  
1003 10.1007/s00572-018-0825-0 PMID - 29455336.
- 1004 89. Bukovská P, Gryndler M, Gryndlerová H, Püschel D, Jansa J. Organic Nitrogen-Driven  
1005 Stimulation of Arbuscular Mycorrhizal Fungal Hyphae Correlates with Abundance of  
1006 Ammonia Oxidizers. *Front Microbiol*. 2016;7(149):859; doi: 10.3389/fmicb.2016.00711.
- 1007 90. Wattenburger CJ, Gutknecht J, Zhang Q, Brutnell T, Hofmockel K, Halverson L. The  
1008 rhizosphere and cropping system, but not arbuscular mycorrhizae, affect ammonia  
1009 oxidizing archaea and bacteria abundances in two agricultural soils. *Appl Soil Ecol*.  
1010 2020;151:103540; doi: 10.1016/j.apsoil.2020.103540.
- 1011 91. Kozłowski JA, Stieglmeier M, Schleper C, Klotz MG, Stein LY. Pathways and key  
1012 intermediates required for obligate aerobic ammonia-dependent chemolithotrophy in  
1013 bacteria and Thaumarchaeota. *ISME J*. 2016;10(8):1836-45; doi: 10.1038/ismej.2016.2  
1014 PMID - 26882267.
- 1015 92. Staddon PL, Ramsey CB, Ostle N, Ineson P, Fitter AH. Rapid turnover of hyphae of  
1016 mycorrhizal fungi determined by AMS microanalysis of C-14. *Science*.  
1017 2003;300(5622):1138-40.
- 1018 93. See CR, Keller AB, Hobbie SE, Kennedy PG, Weber PK, Pett-Ridge J. Hyphae move  
1019 matter and microbes to mineral microsites: Integrating the hyphosphere into conceptual  
1020 models of soil organic matter stabilization. *Global Change Biol*. 2022;28(8):2527-40; doi:  
1021 10.1111/gcb.16073 PMID - 34989058.
- 1022 94. Wright SF, Franke-Snyder M, Morton JB, Upadhyaya A. Time-course study and partial  
1023 characterization of a protein on hyphae of arbuscular mycorrhizal fungi during active  
1024 colonization of roots. *Plant Soil*. 1996;181(2):193-203; doi: 10.1007/bf00012053.
- 1025 95. Montgomery L, Flesher B, Stahl D. Transfer of *Bacteroides succinogenes* (Hungate) to  
1026 *Fibrobacter* gen. nov. as *Fibrobacter succinogenes* comb. nov. and description of  
1027 *Fibrobacter intestinalis* sp. nov. *Int J Syst Bacteriol*. 1988;38(4):430-5; doi:  
1028 10.1099/00207713-38-4-430.
- 1029 96. Ivanova AA, Wegner CE, Kim Y, Liesack W, Dedysh SN. Identification of microbial  
1030 populations driving biopolymer degradation in acidic peatlands by metatranscriptomic  
1031 analysis. *Mol Ecol*. 2016;25(19):4818-35; doi: 10.1111/mec.13806.
- 1032 97. Rahman NA, Parks DH, Vanwongerghem I, Morrison M, Tyson GW, Hugenholtz P. A  
1033 phylogenomic analysis of the bacterial phylum Fibrobacteres. *Front Microbiol*.  
1034 2016;6(149):1469; doi: 10.3389/fmicb.2015.01469.
- 1035 98. Edwards J, Johnson C, Santos-Medellín C, Lurie E, Podishetty NK, Bhatnagar S, et al.  
1036 Structure, variation, and assembly of the root-associated microbiomes of rice. *Proc Natl*  
1037 *Acad Sci USA*. 2015;112(8):E911-E20; doi: 10.1073/pnas.1414592112.
- 1038 99. van Passel MWJ, Kant R, Palva A, Copeland A, Lucas S, Lapidus A, et al. Genome  
1039 sequence of the Verrucomicrobium *Opitutus terrae* PB90-1, an abundant inhabitant of  
1040 rice paddy soil ecosystems. *J Bacteriol*. 2011;193(9):2367-8; doi: 10.1128/JB.00228-11.
- 1041 100. Wertz JT, Kim E, Breznak JA, Schmidt TM, Rodrigues JLM. Genomic and physiological  
1042 characterization of the Verrucomicrobia isolate *Diplosphaera colitermitum* gen. nov., sp.  
1043 nov., reveals microaerophily and nitrogen fixation genes. *Appl Environ Microbiol*.  
1044 2012;78(5):1544-55; doi: 10.1128/AEM.06466-11.

- 1045 101. Lin JY, Russell JA, Sanders JG, Wertz JT. *Cephaloticoccus* gen. nov., a new genus of  
1046 'Verrucomicrobia' containing two novel species isolated from *Cephalotes* ant guts. *Int J*  
1047 *Syst Evol Microbiol.* 2016;66(8):3034-40; doi: 10.1099/ijsem.0.001141.
- 1048 102. Hünninghaus M, Dibbern D, Kramer S, Koller R, Pausch J, Schloter-Hai B, et al.  
1049 Disentangling carbon flow across microbial kingdoms in the rhizosphere of maize. *Soil*  
1050 *Biol Biochem.* 2019;134:122-30; doi: 10.1016/j.soilbio.2019.03.007.
- 1051 103. Nuccio EE, Starr E, Karaoz U, Brodie EL, Zhou J, Tringe SG, et al. Niche differentiation  
1052 is spatially and temporally regulated in the rhizosphere. *ISME J.* 2020;269(9):1-16; doi:  
1053 10.1038/s41396-019-0582-x.
- 1054 104. Kersten W, Kersten H, Szybalski W, Fiandt M. Physicochemical Properties of  
1055 Complexes between Deoxyribonucleic Acid and Antibiotics Which Affect Ribonucleic  
1056 Acid Synthesis (Actinomycin, Daunomycin, Cinerubin, Nogalamycin, Chromomycin,  
1057 Mithramycin, and Olivomycin) \*. *Biochemistry.* 1966;5(1):236-44; doi:  
1058 10.1021/bi00865a031 PMID - 4161040.  
1059

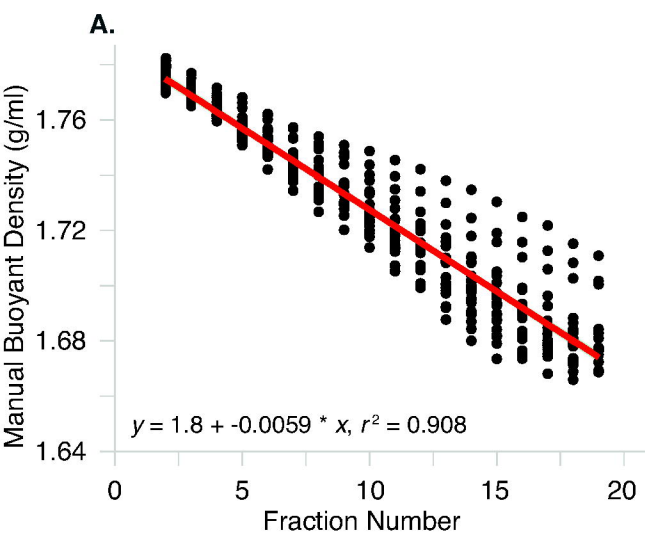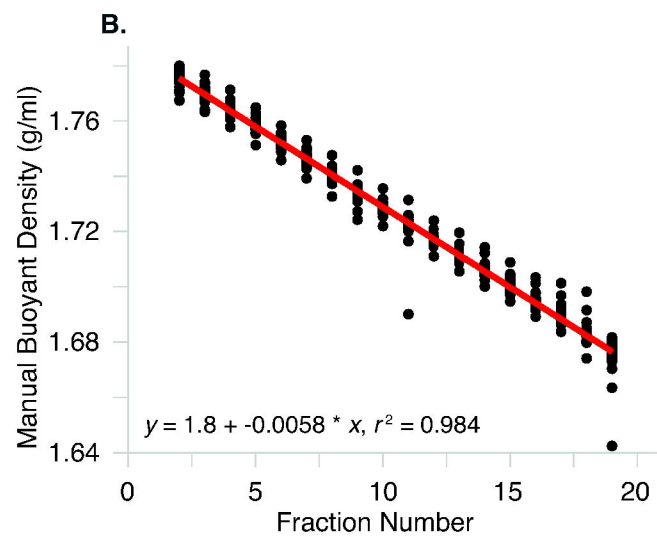



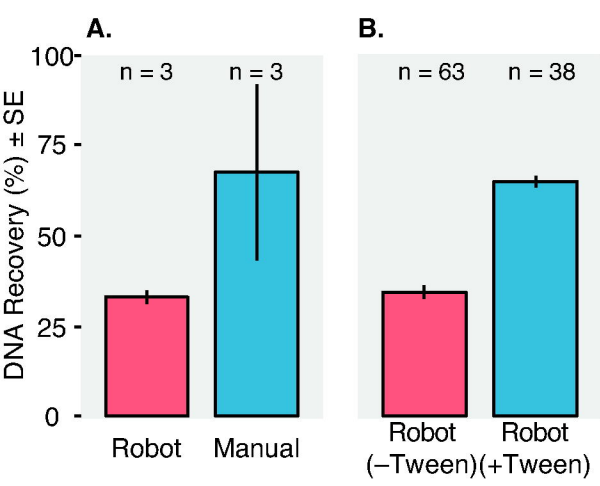

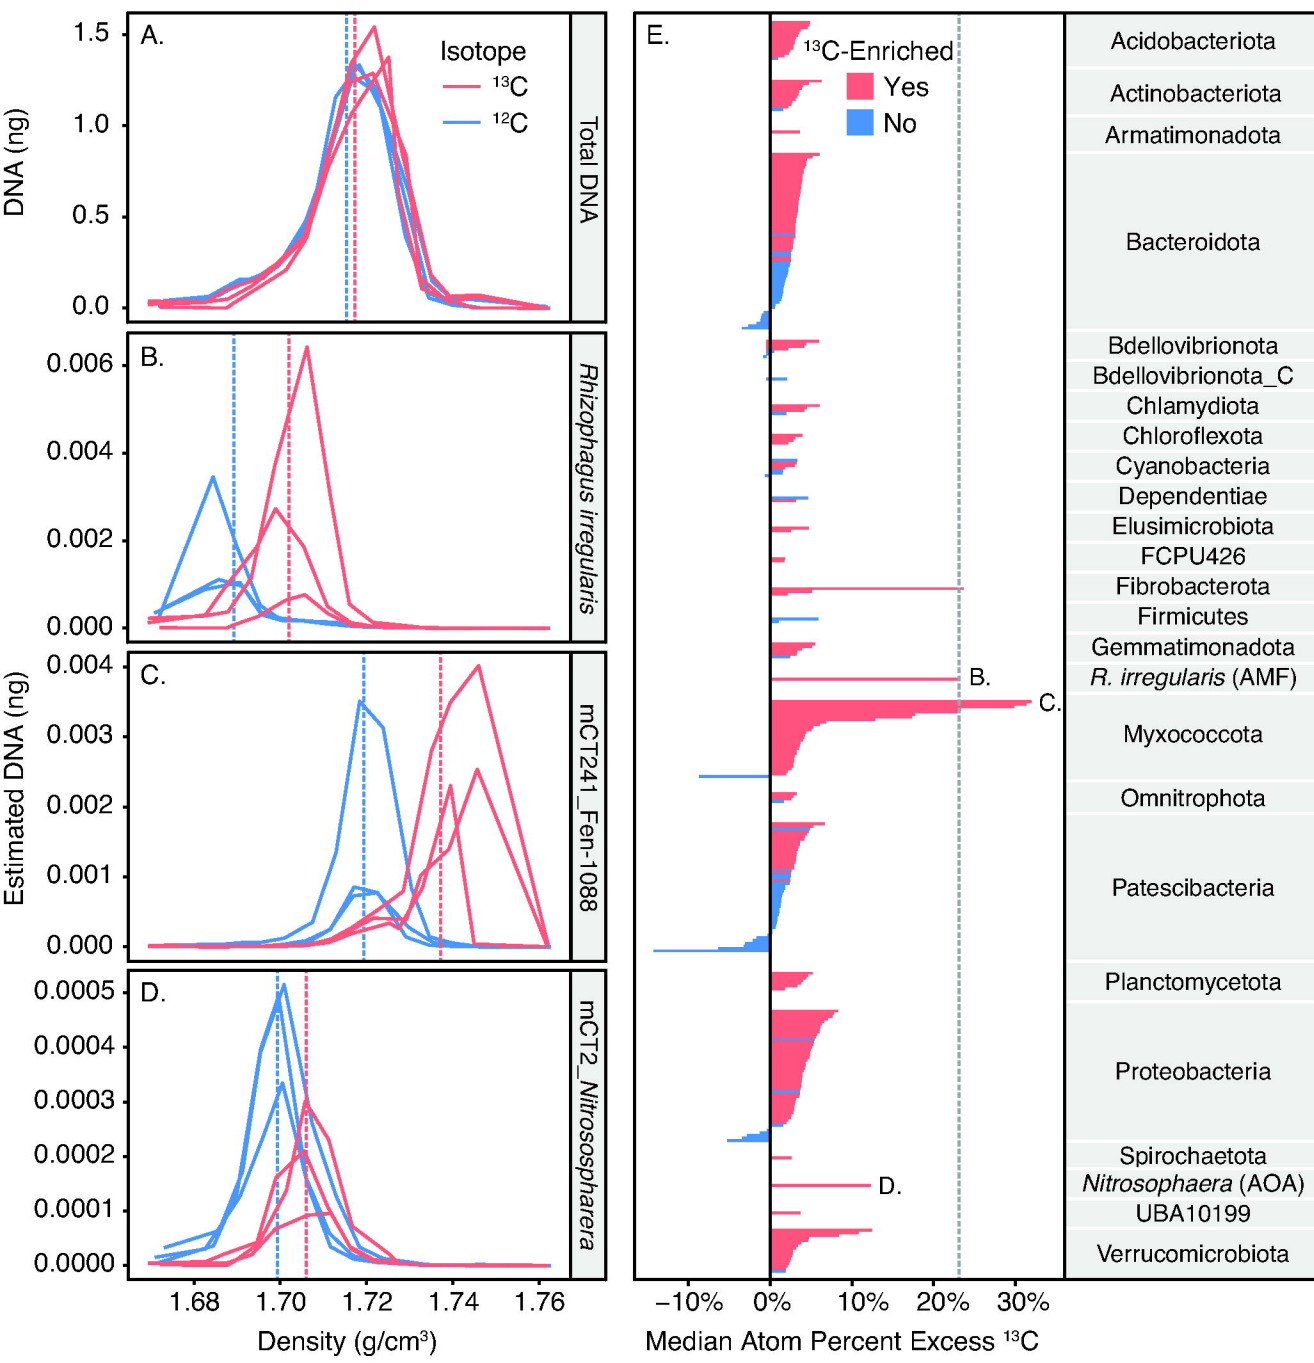

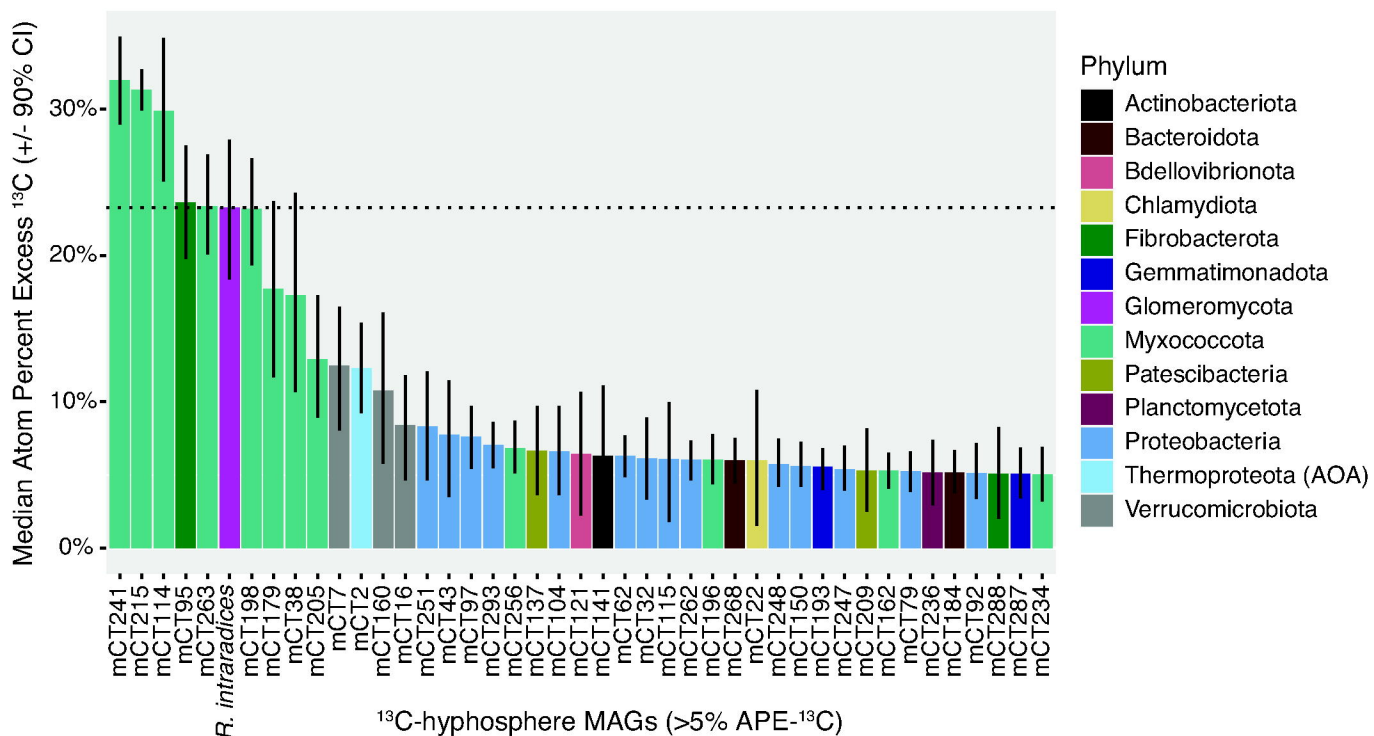

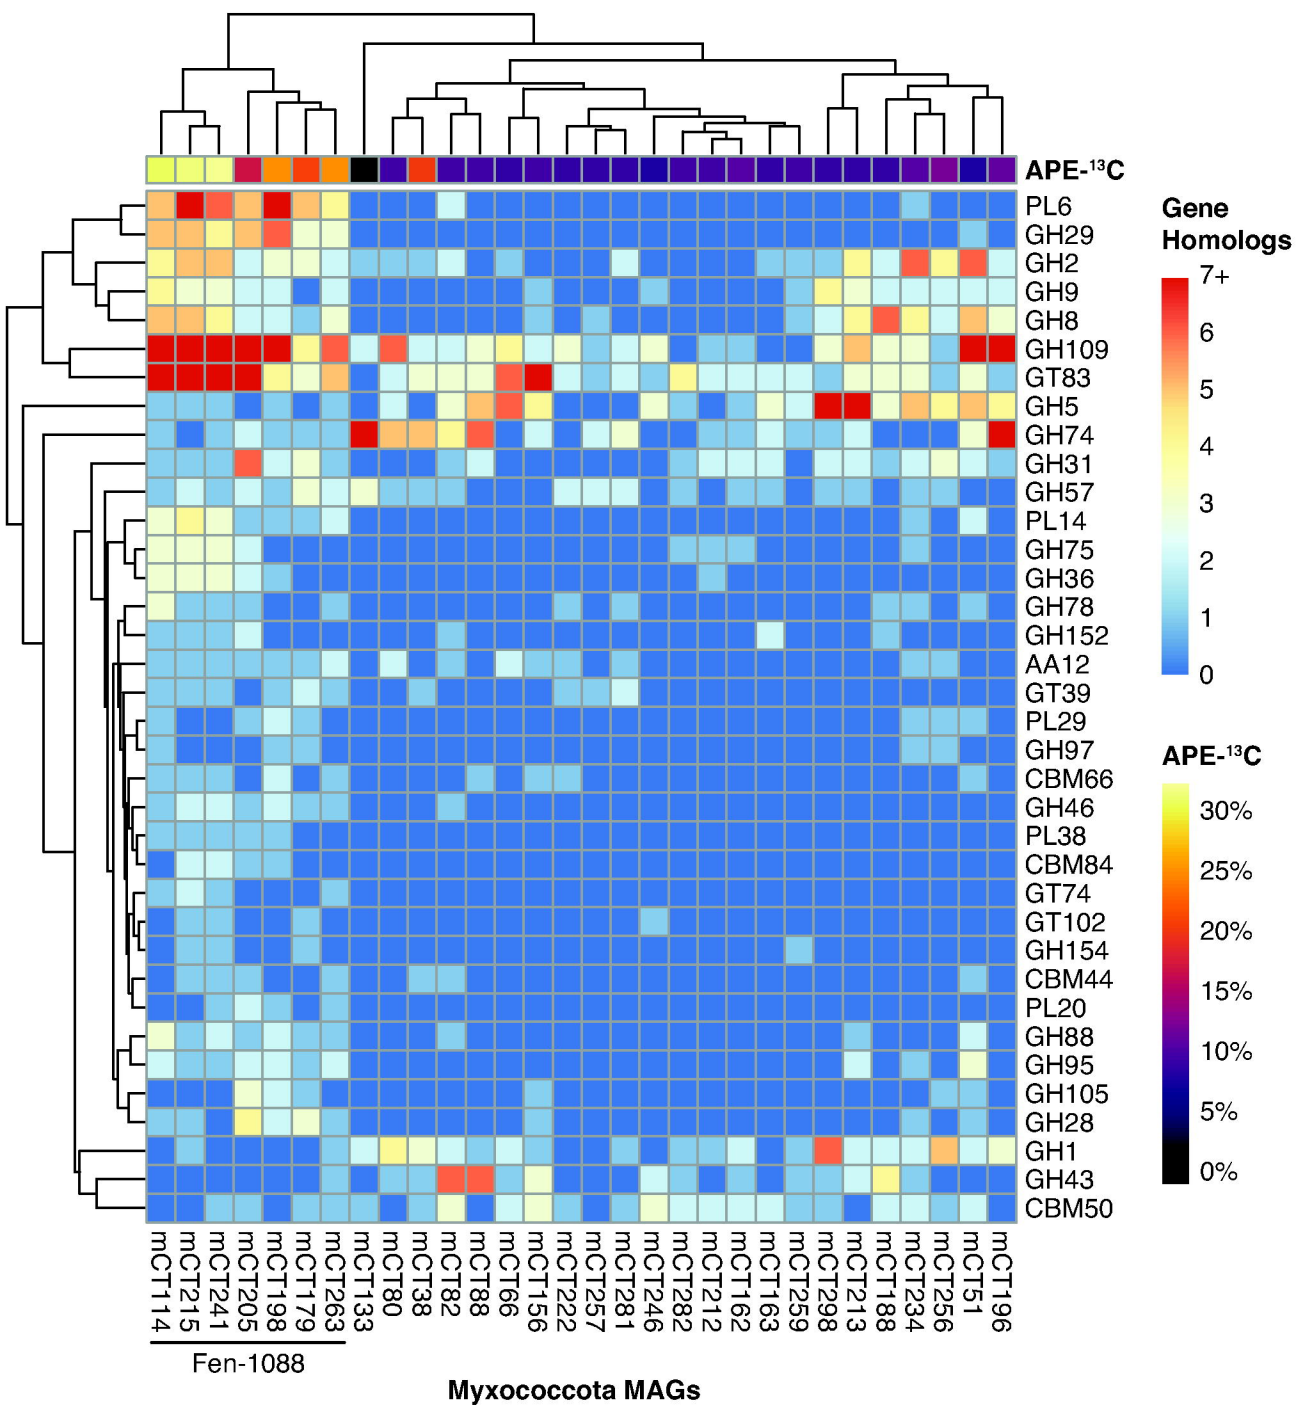

Source: http://biorxiv.org/content/10.1101/2022.07.01.498377v1.full.pdf
